# Supplementary material for: Anti‐IFN‐α/‐ω neutralizing antibodies from COVID‐19 patients correlate with downregulation of IFN response and laboratory biomarkers of disease severity
Source: PubMed Central journal article supplement (PMC9087404; doi:10.1002/eji.202249824), 2022-04-28
Supplement: EJI-52-1120-s001.pdf [file EJI-52-1120-s001.pdf]

Supplementary Table 1. Number of COVID-19 patients with anti-IFN- $\omega$  neutralizing antibodies (NAB, %) stratified according to anti-IFN- $\alpha$ 2 NAB titer, gender, and clinical parameters

| Patients stratified according to anti-IFN- $\alpha$ 2 NAB titer (%) (n=13) | Number of anti-IFN- $\omega$ NAB patients (%) | Number of anti-IFN- $\omega$ NAB male patients (%) * | Number of anti-IFN- $\omega$ NAB patients admitted to ICU (%) ** | Number of anti-IFN- $\omega$ NAB patients with fatal outcome (%) *** |
|----------------------------------------------------------------------------|-----------------------------------------------|------------------------------------------------------|------------------------------------------------------------------|----------------------------------------------------------------------|
| 3/13 (23)<br>(Low: < 1000, range 500 – 13 TRU/ml)                          | 1/3 (33.3)                                    | 1/1 (100)                                            | 0/1 (0)                                                          | 0/1 (0)                                                              |
| 4/13 (30.8)<br>(Intermediate: $\geq$ 1000, range 8533 – 5688 TRU/ml)       | 2/4 (50)                                      | 1/2 (50)                                             | 1/2 (50)                                                         | 1/2 (50)                                                             |
| 6/13 (46.1)<br>(High: $\geq$ 10.000, range 34133 – 10666 TRU/ml)           | 6/6 (100)                                     | 6/6 (100)                                            | 6/6 (100)                                                        | 6/6 (100)                                                            |

Data are expressed as proportion of COVID-19 patients with anti-IFN- $\alpha$ 2 or IFN- $\omega$  NAB (%). Statistical analysis was performed using Fisher's exact test or Yates Chi-square. \*Male sex association: **p=0.0034** [anti-IFN- $\omega$  NAB male patients (8/9) vs anti-IFN- $\omega$  NAB female patient (1/9)]; \*\*ICU admission: **p<0.0001** [anti-IFN-I BAB negative patients (42/299) vs anti-IFN- $\omega$  NAB positive patients (7/9)]; \*\*\*Death rate: **p<0.0001** [anti-IFN-I BAB negative patients (32/299) vs anti-IFN- $\omega$  NAB positive patients (7/9)].

Supplementary Table 2. Anti-IFN-I neutralizing antibodies (NAB) in samples collected from the respiratory tract of COVID-19 patients

| Patients No. | Sex | Age (years) | Respiratory sample | Days of hospitalization | Clinical characteristics | NAB to IFN- $\alpha$ 2 (TRU/ml, serum samples) | NAB to IFN- $\alpha$ 2 (TRU/ml, respiratory samples) | NAB to IFN- $\alpha$ 1* (TRU/ml, respiratory samples) | NAB to IFN- $\omega$ (TRU/ml, respiratory samples) | NAB to IFN- $\beta$ (TRU/ml, respiratory samples) |
|--------------|-----|-------------|--------------------|-------------------------|--------------------------|------------------------------------------------|------------------------------------------------------|-------------------------------------------------------|----------------------------------------------------|---------------------------------------------------|
| 14           | M   | 79          | BAL                | 72                      | ICU                      | <10                                            | <10                                                  | <10                                                   | <10                                                | <10                                               |
| 15           | M   | 69          | BAL                | 15                      | ICU                      | <10                                            | <10                                                  | <10                                                   | <10                                                | <10                                               |
| 16           | F   | 76          | BAL                | 12                      | ICU, dead                | <10                                            | <10                                                  | <10                                                   | <10                                                | <10                                               |
| 17           | M   | 73          | BAL                | 1                       | ICU, dead                | <10                                            | <10                                                  | <10                                                   | <10                                                | <10                                               |
| 18           | F   | 63          | BAL                | NA                      | ICU, dead                | <10                                            | <10                                                  | <10                                                   | <10                                                | <10                                               |
| 19           | M   | 38          | BAL                | 65                      | ICU, ECMO, dead          | <10                                            | <10                                                  | <10                                                   | <10                                                | <10                                               |
| 20           | M   | 67          | BAL                | 60                      | ICU, dead                | <10                                            | <10                                                  | <10                                                   | <10                                                | <10                                               |
| 21           | M   | 80          | BAL                | 91                      | VMK, CPAP                | <10                                            | <10                                                  | <10                                                   | <10                                                | <10                                               |

|    |   |    |     |     |                                                         |              |           |           |     |     |
|----|---|----|-----|-----|---------------------------------------------------------|--------------|-----------|-----------|-----|-----|
| 7* | M | 70 | BAL | 43  | ICU, ECMO, diabetes,<br>hypertension, IHD,<br>DVT, dead | <b>17066</b> | <b>20</b> | <b>15</b> | <10 | <10 |
| 22 | F | 80 | BAL | 130 | ICU                                                     | <10          | <b>15</b> | <b>10</b> | <10 | <10 |
| 23 | F | 73 | BAL | 10  | ICU, dead                                               | <10          | <b>10</b> | <10       | <10 | <10 |
| 24 | F | 67 | NPS | NA  | Oxygen support                                          | <10          | <10       | <10       | <10 | <10 |
| 25 | F | 29 | NPS | NA  | No oxygen support                                       | <10          | <10       | <10       | <10 | <10 |
| 26 | F | 62 | NPS | 12  | Oxygen support                                          | <10          | <10       | <10       | <10 | <10 |
| 27 | M | 54 | NPS | 14  | NA                                                      | <10          | <10       | <10       | <10 | <10 |
| 28 | F | 62 | NPS | NA  | NA                                                      | <10          | <10       | <10       | <10 | <10 |
| 29 | M | 52 | NPS | 20  | NA                                                      | <10          | <10       | <10       | <10 | <10 |

---

Clinical characteristics were available of 14 out of 17 COVID-19 patients. NAB positive samples are in bold. IFN- $\alpha$ 1\* = is referred to IFN- $\alpha$  subtypes contained in the natural IFN- $\alpha$  preparation. ICU= intensive care unit; ECMO= extracorporeal membrane oxygenation; VMK= venturi mask; CPAP= continuous positive airway pressure; IHD= ischemic heart disease; DVT= deep vein thrombosis; BAL=bronchoalveolar lavage; NPS=nasopharyngeal swab; NA=not available.

# Supplementary Figure 1

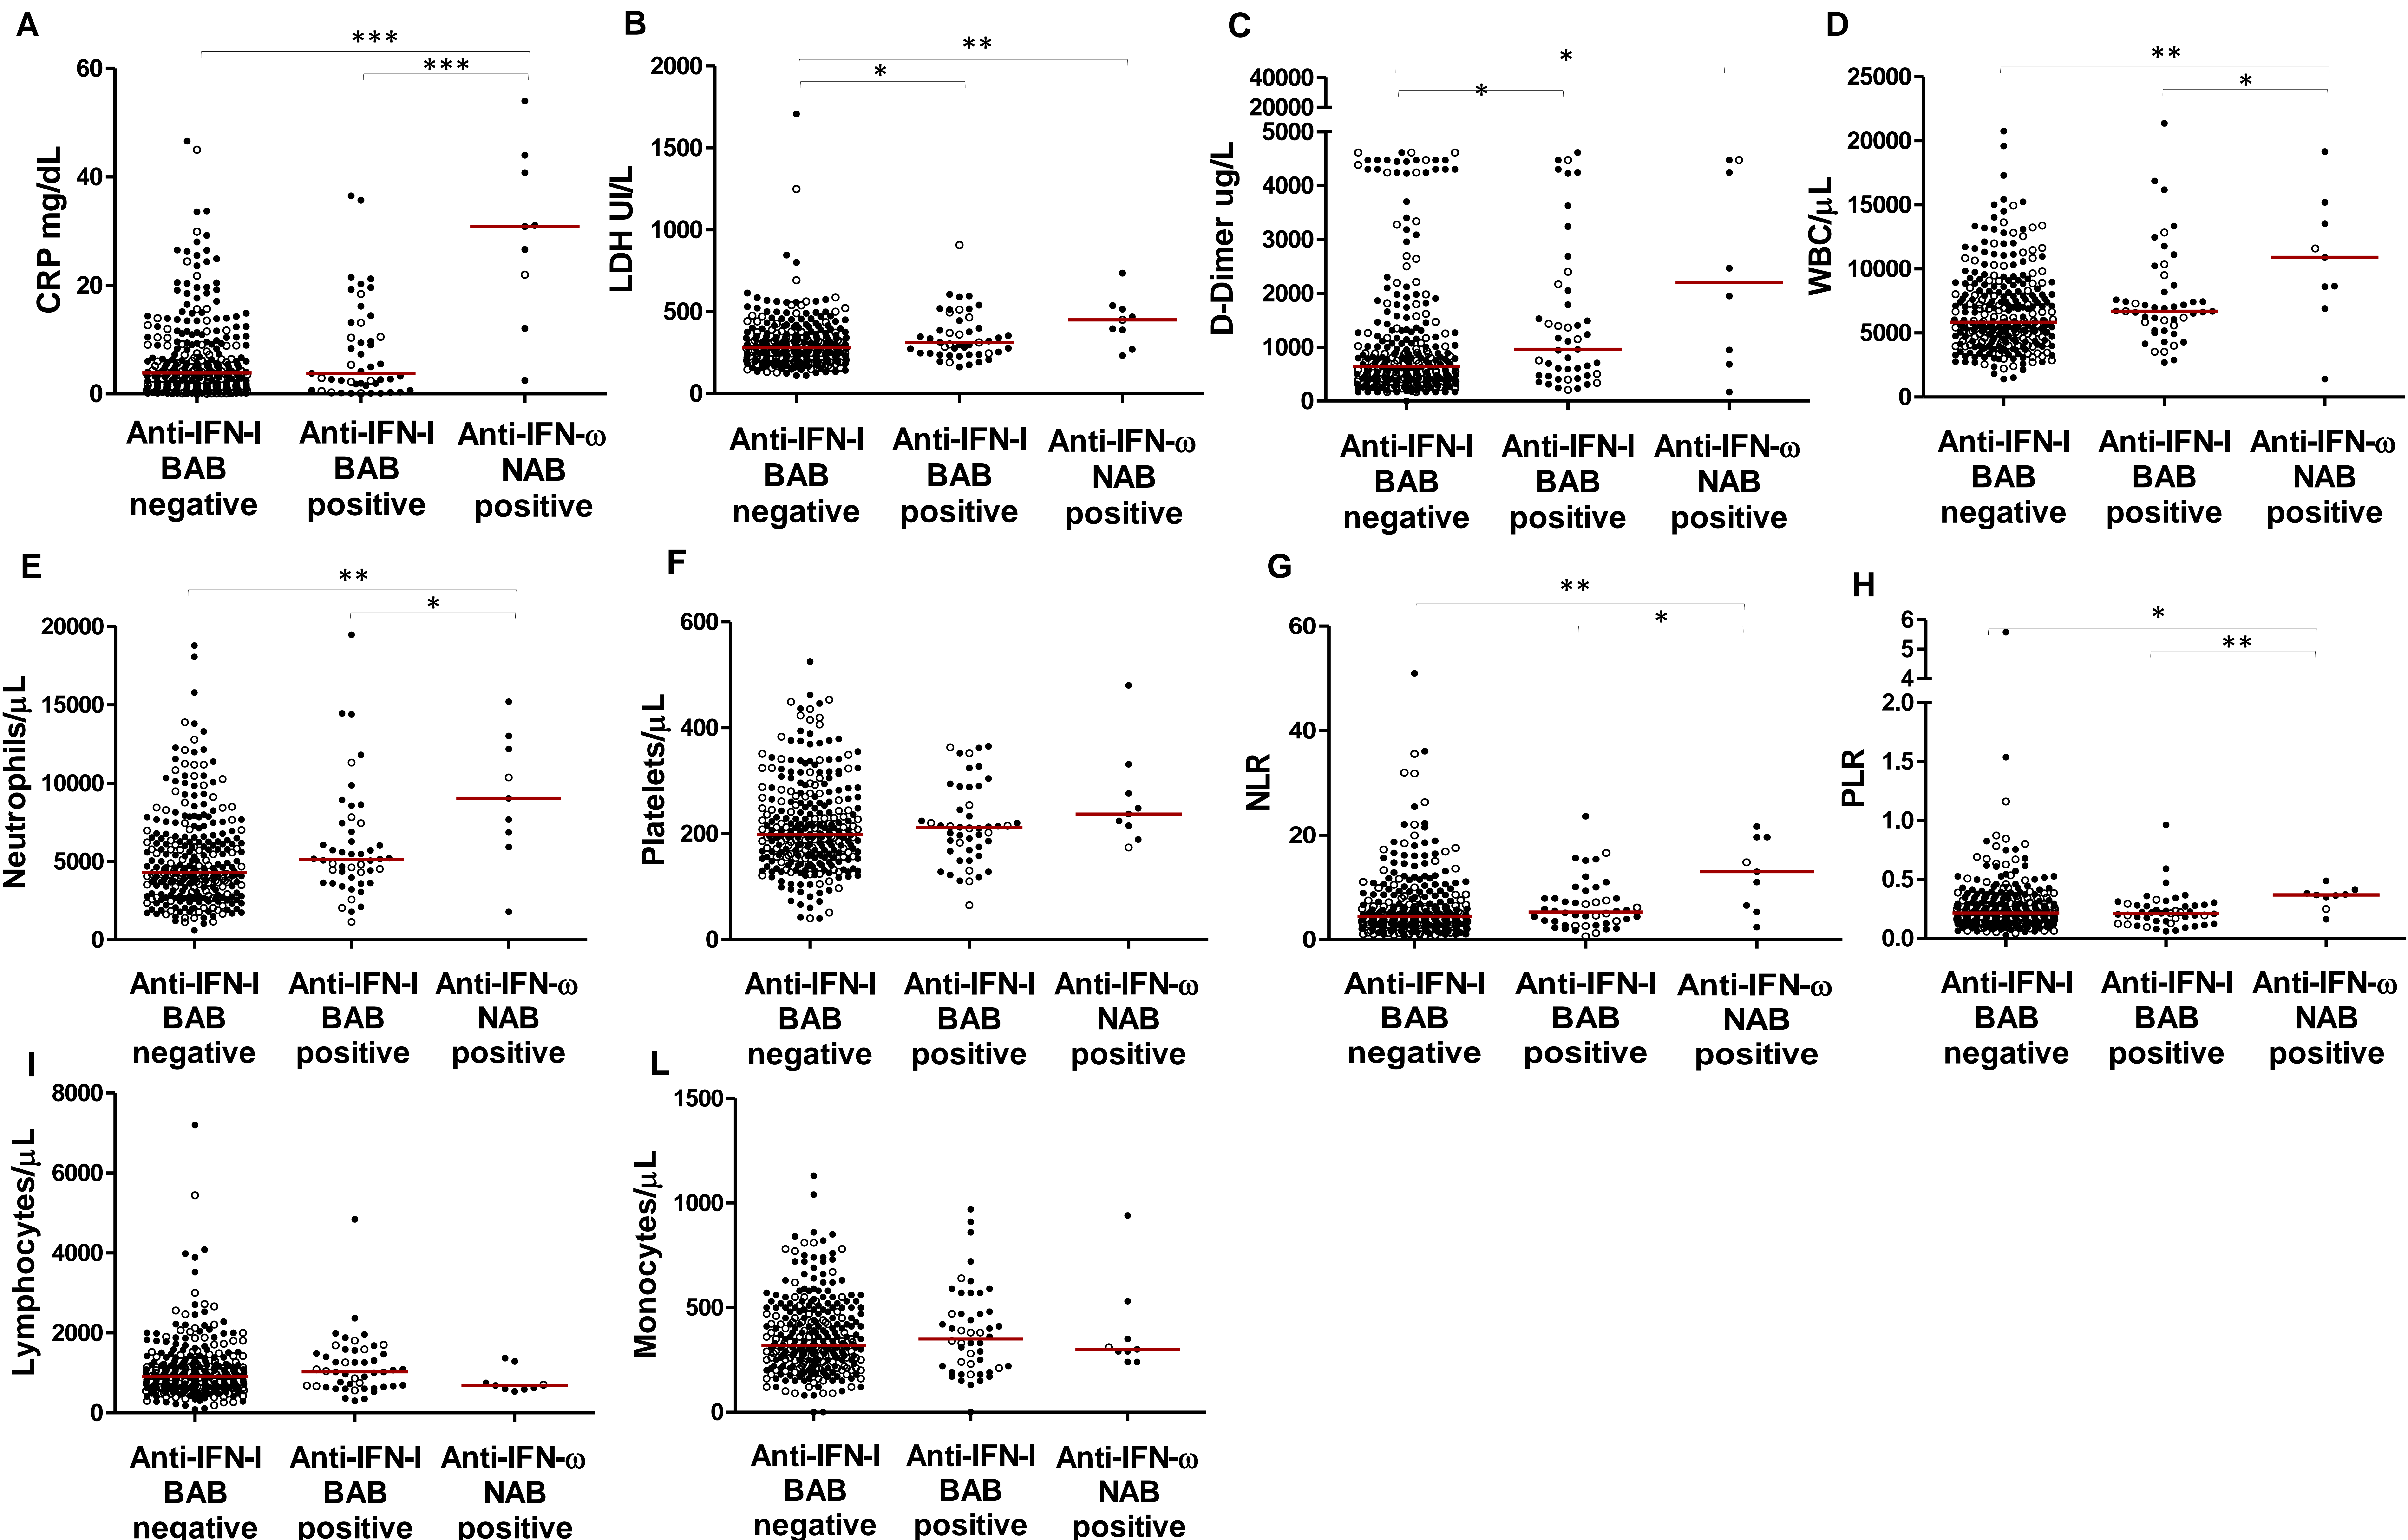

**Supplementary Figure 1. Anti-IFN- $\omega$  NAB were associated with laboratory biomarkers predictive for COVID-19 outcome.** Biochemical and hematological parameters measured in SARS-CoV-2 infected patients, stratified by auto-antibody status as anti-IFN-I BAB negative patients (n=299), anti-IFN- $\alpha/\beta$  BAB positive patients without NAB to IFN- $\alpha$  subtypes, IFN- $\beta$  and IFN- $\omega$  (n=48), and anti-IFN- $\omega$  NAB positive patients (n=9). CRP= C-reactive protein (Panel A); LDH= lactate dehydrogenase (Panel B); D-Dimer (Panel C); WBC= white blood cells (Panel D); neutrophils (Panel E); platelets (Panel F); NLR= neutrophils to lymphocytes ratio (Panel G); PLR=platelets to lymphocytes ratio (Panel H); lymphocytes (Panel I); monocytes (Panel L); Median values of biochemical and hematological parameters are reported, for each group of study, with a red horizontal line. Female patients are represented with open circle symbols while male patients with close circle symbols. \*p<0.05; \*\*p<0.01; \*\*\*p $\leq$  0.001. Values of biochemical and hematological parameters were compared by Mann-Whitney test.

# Supplementary Figure 2

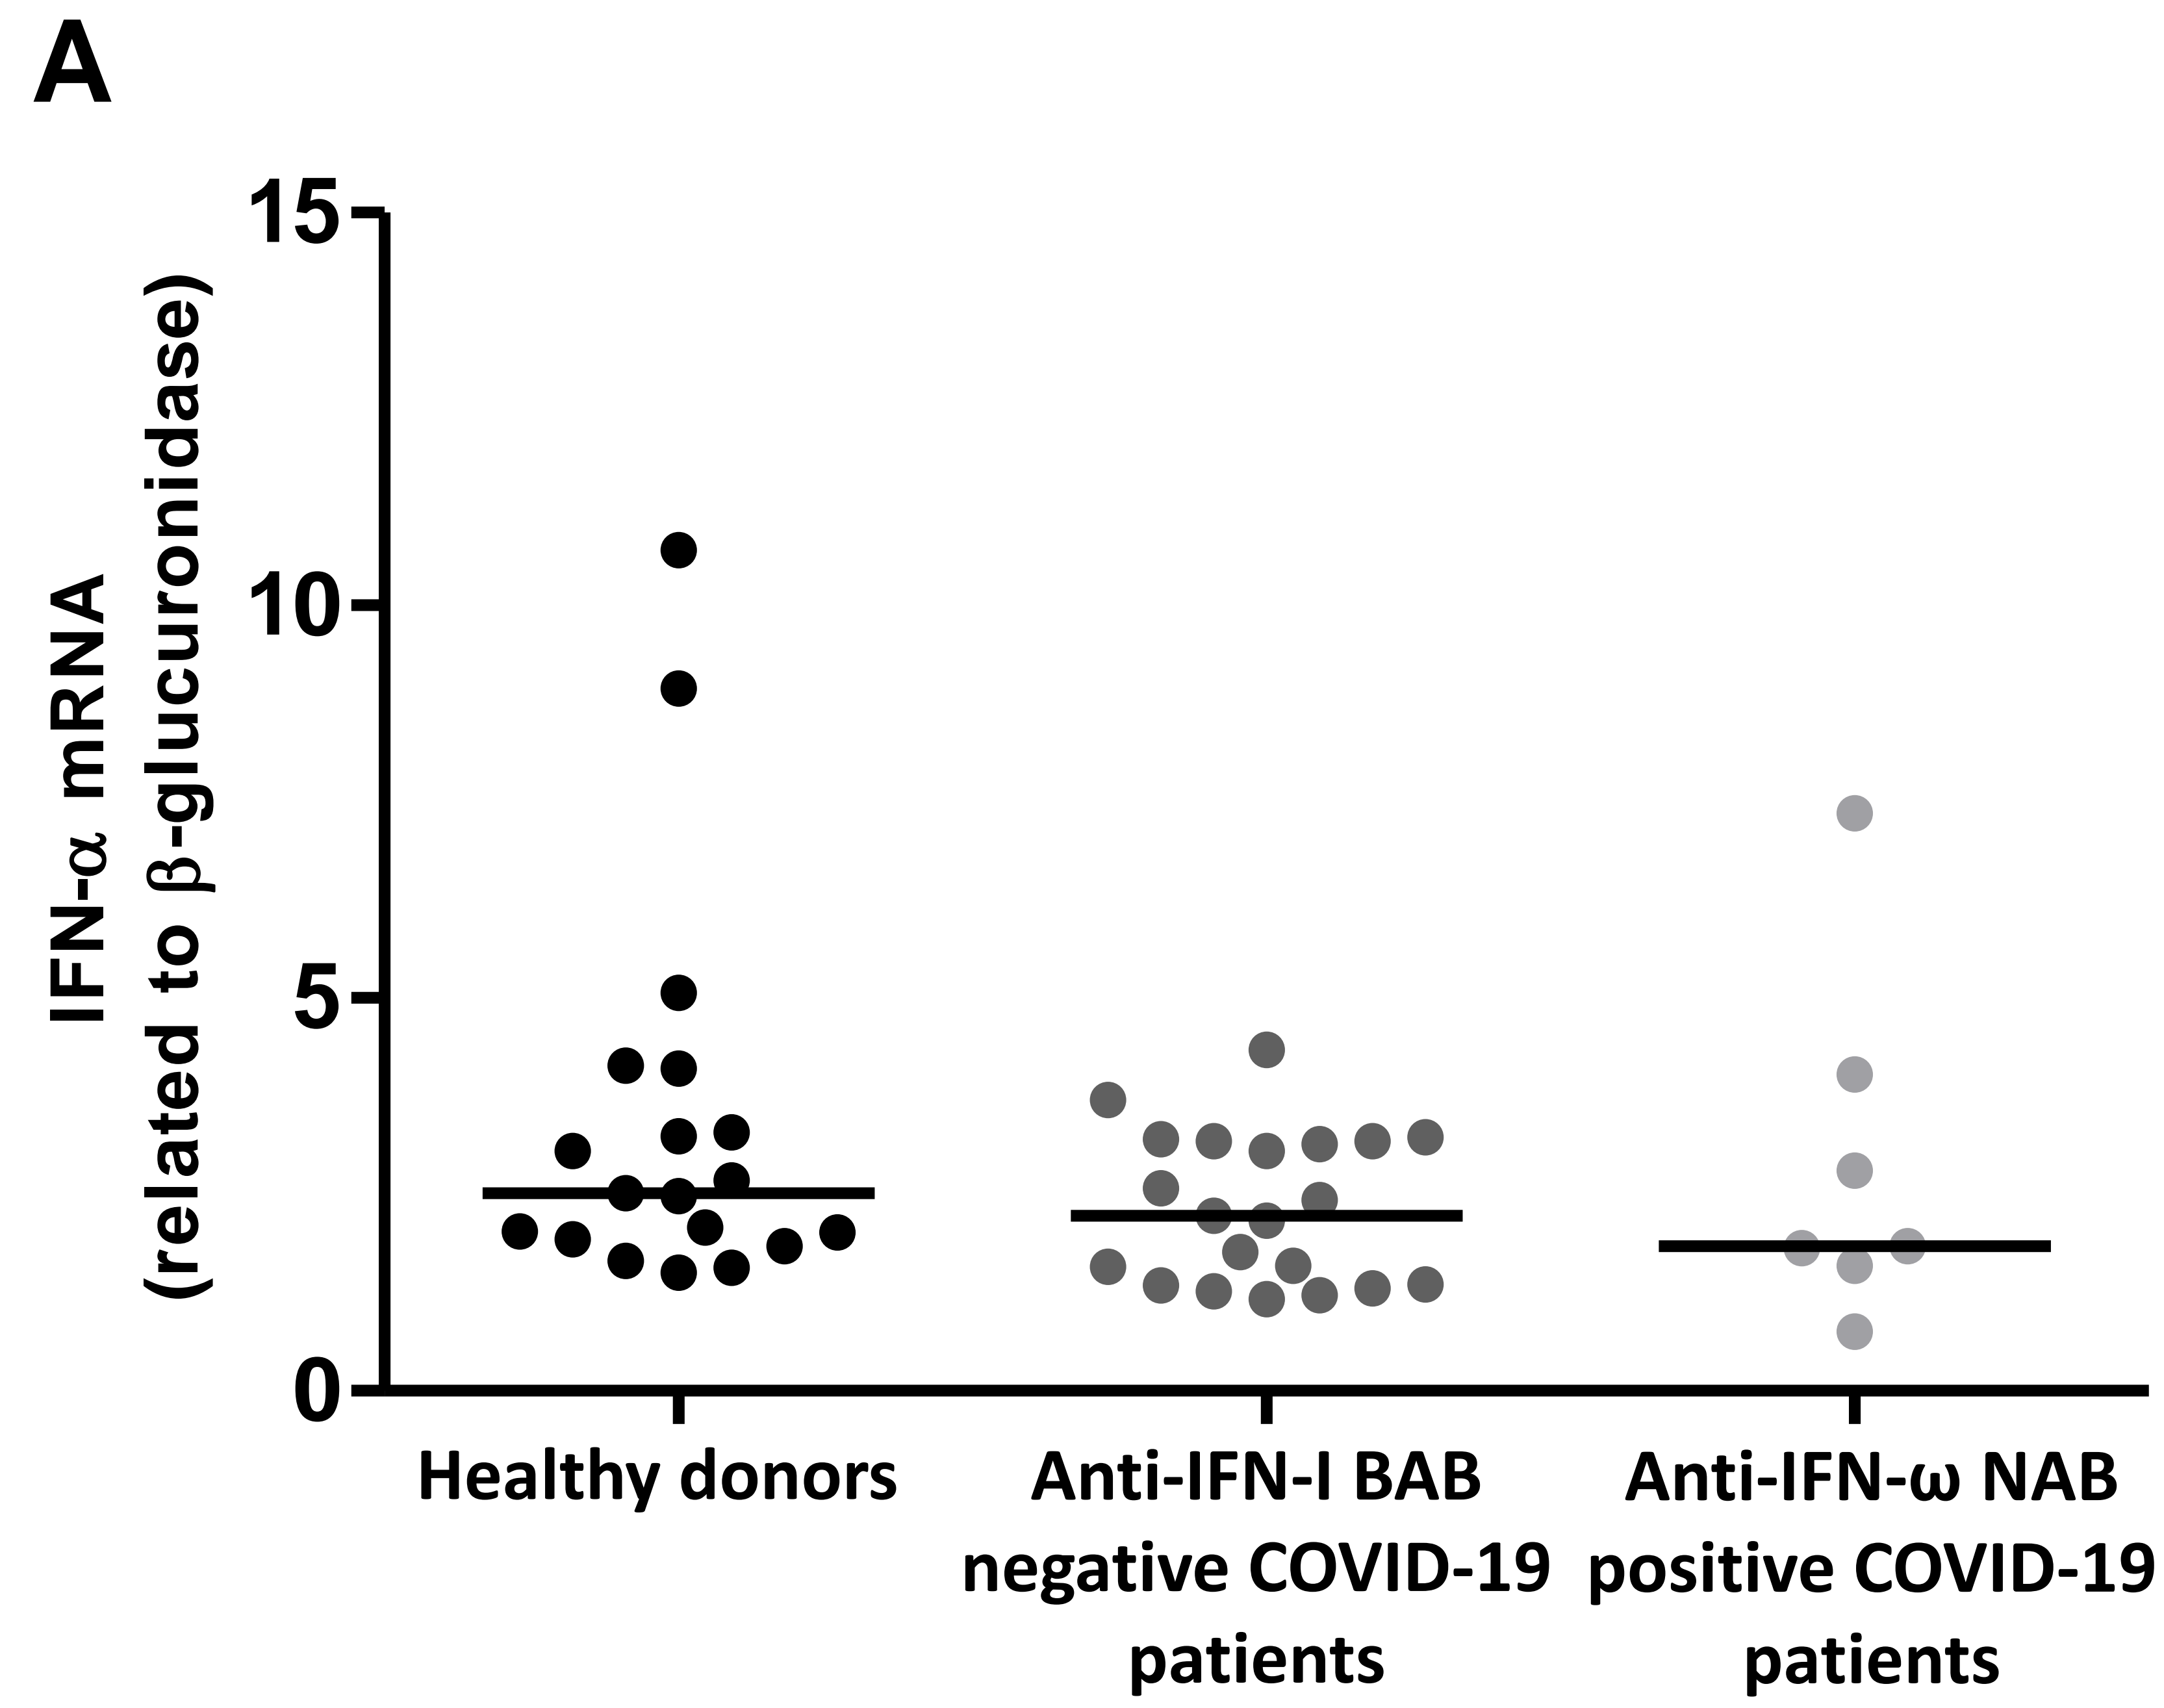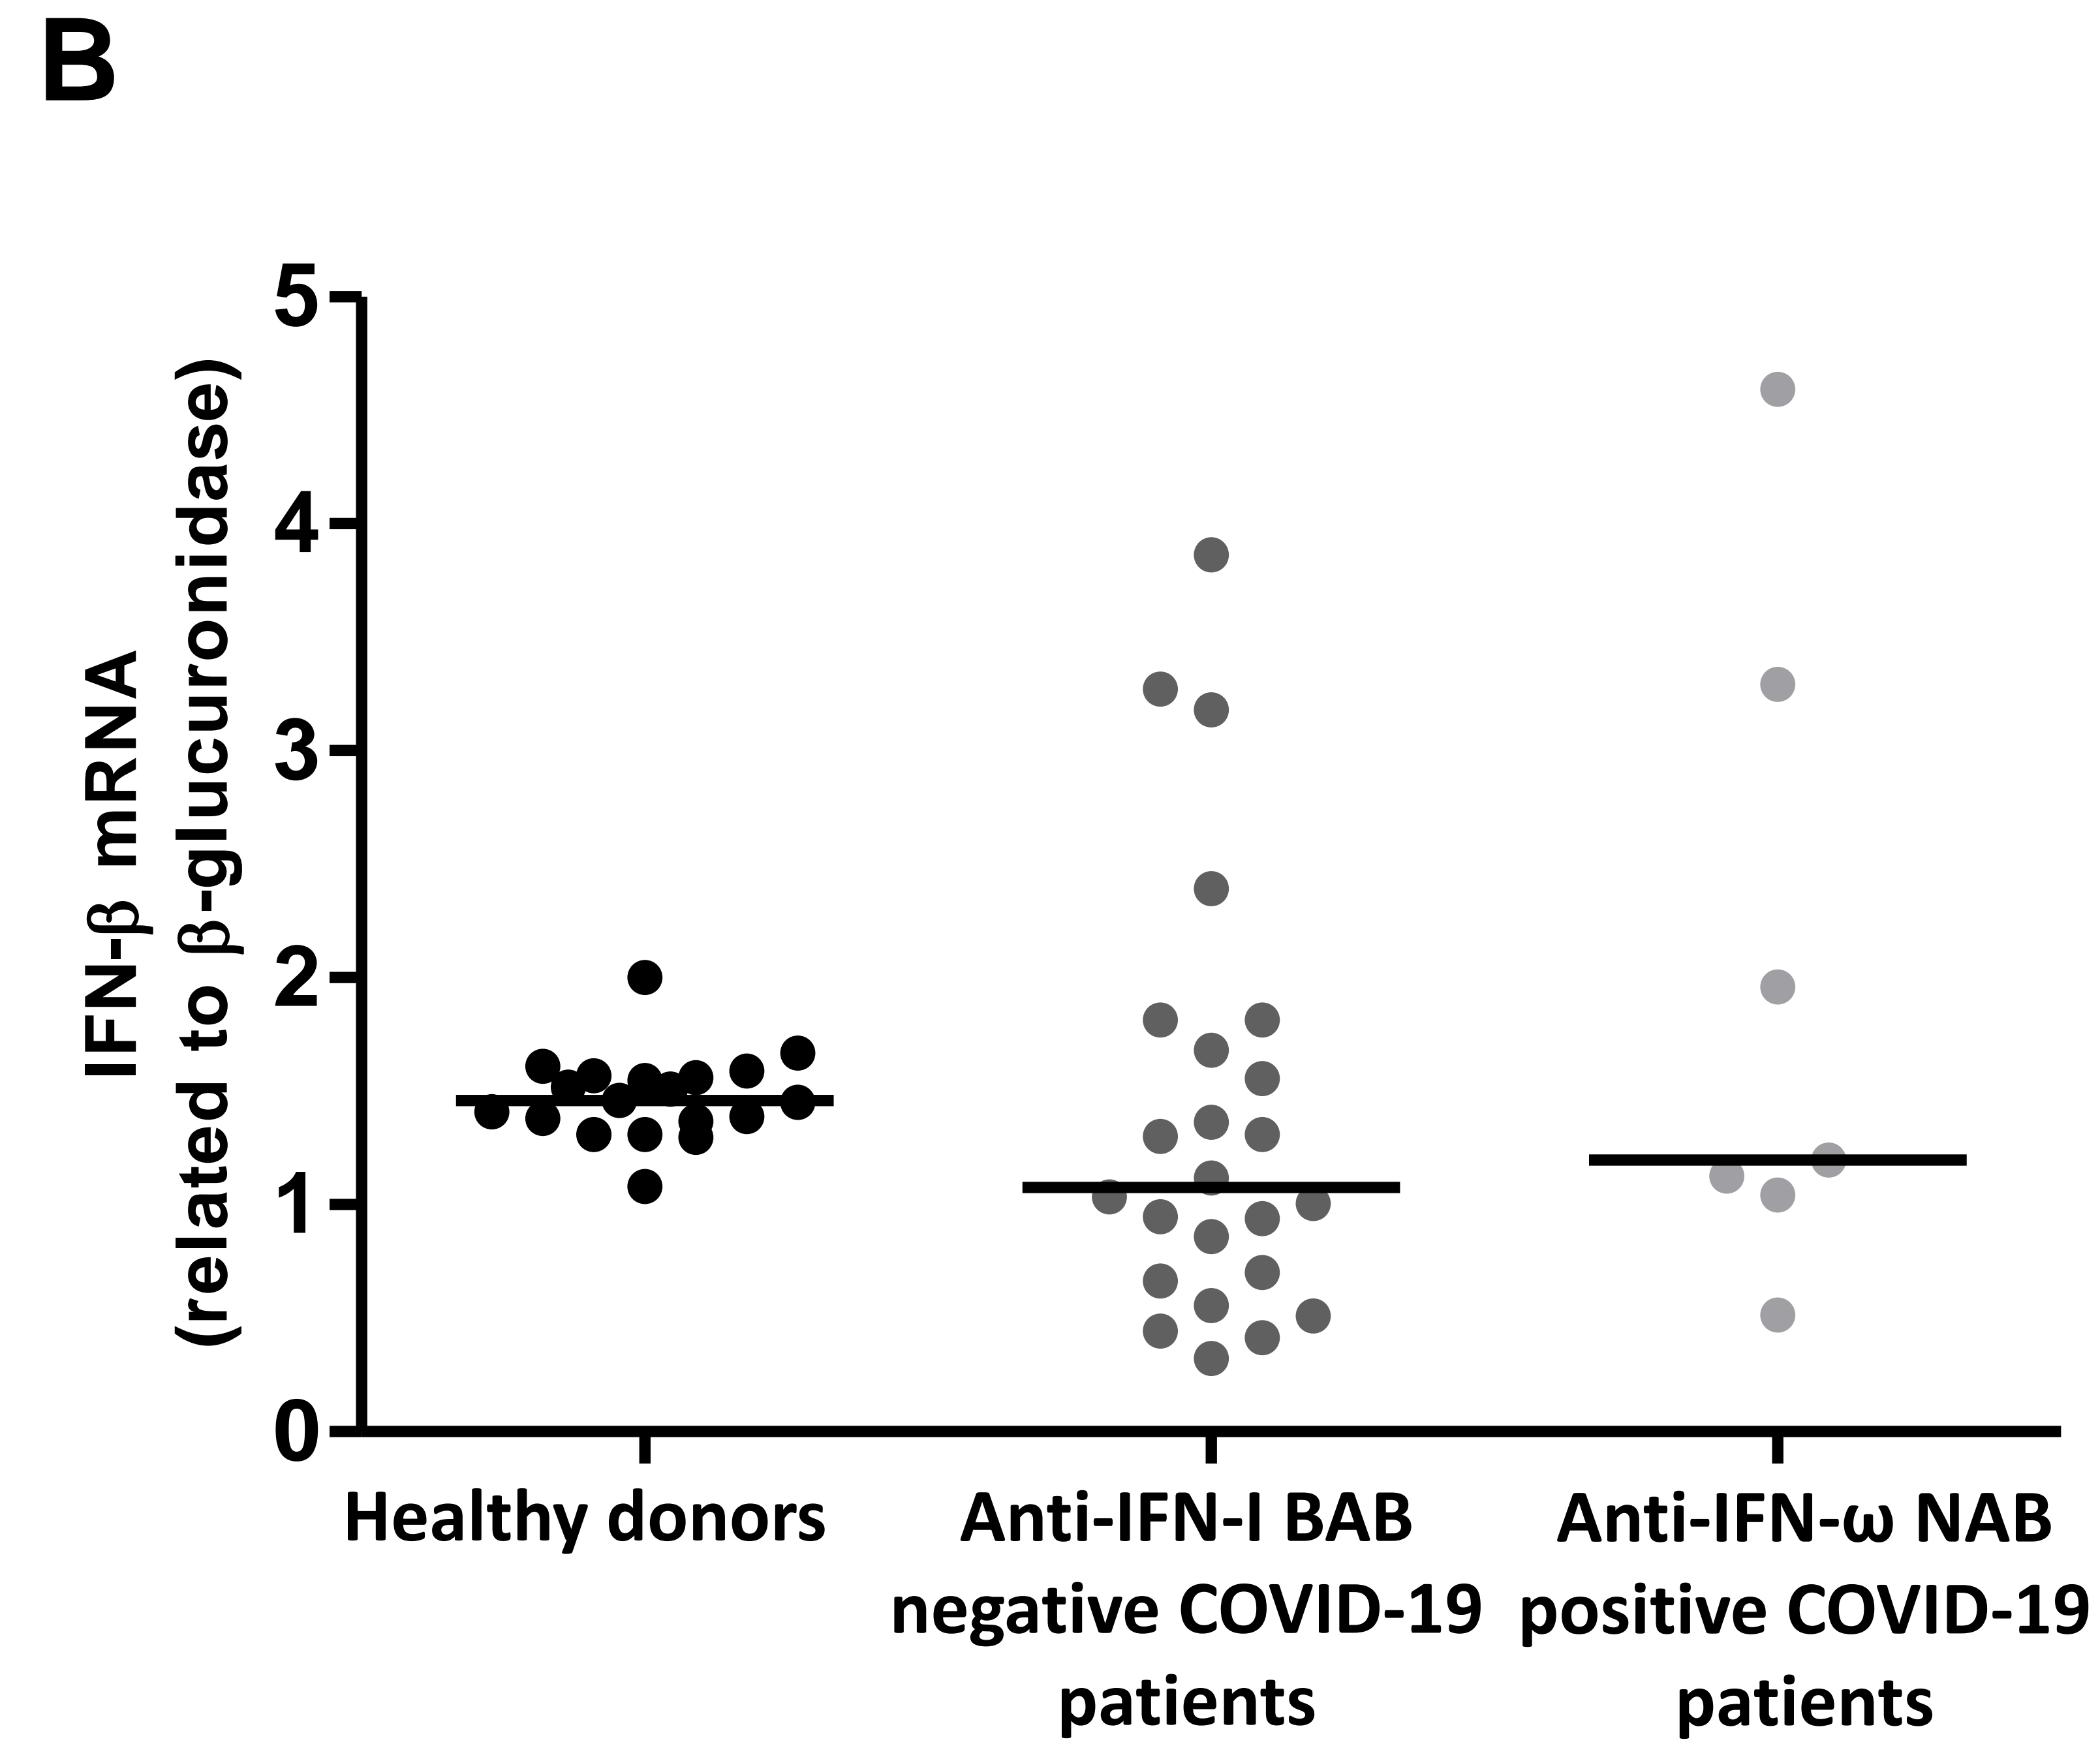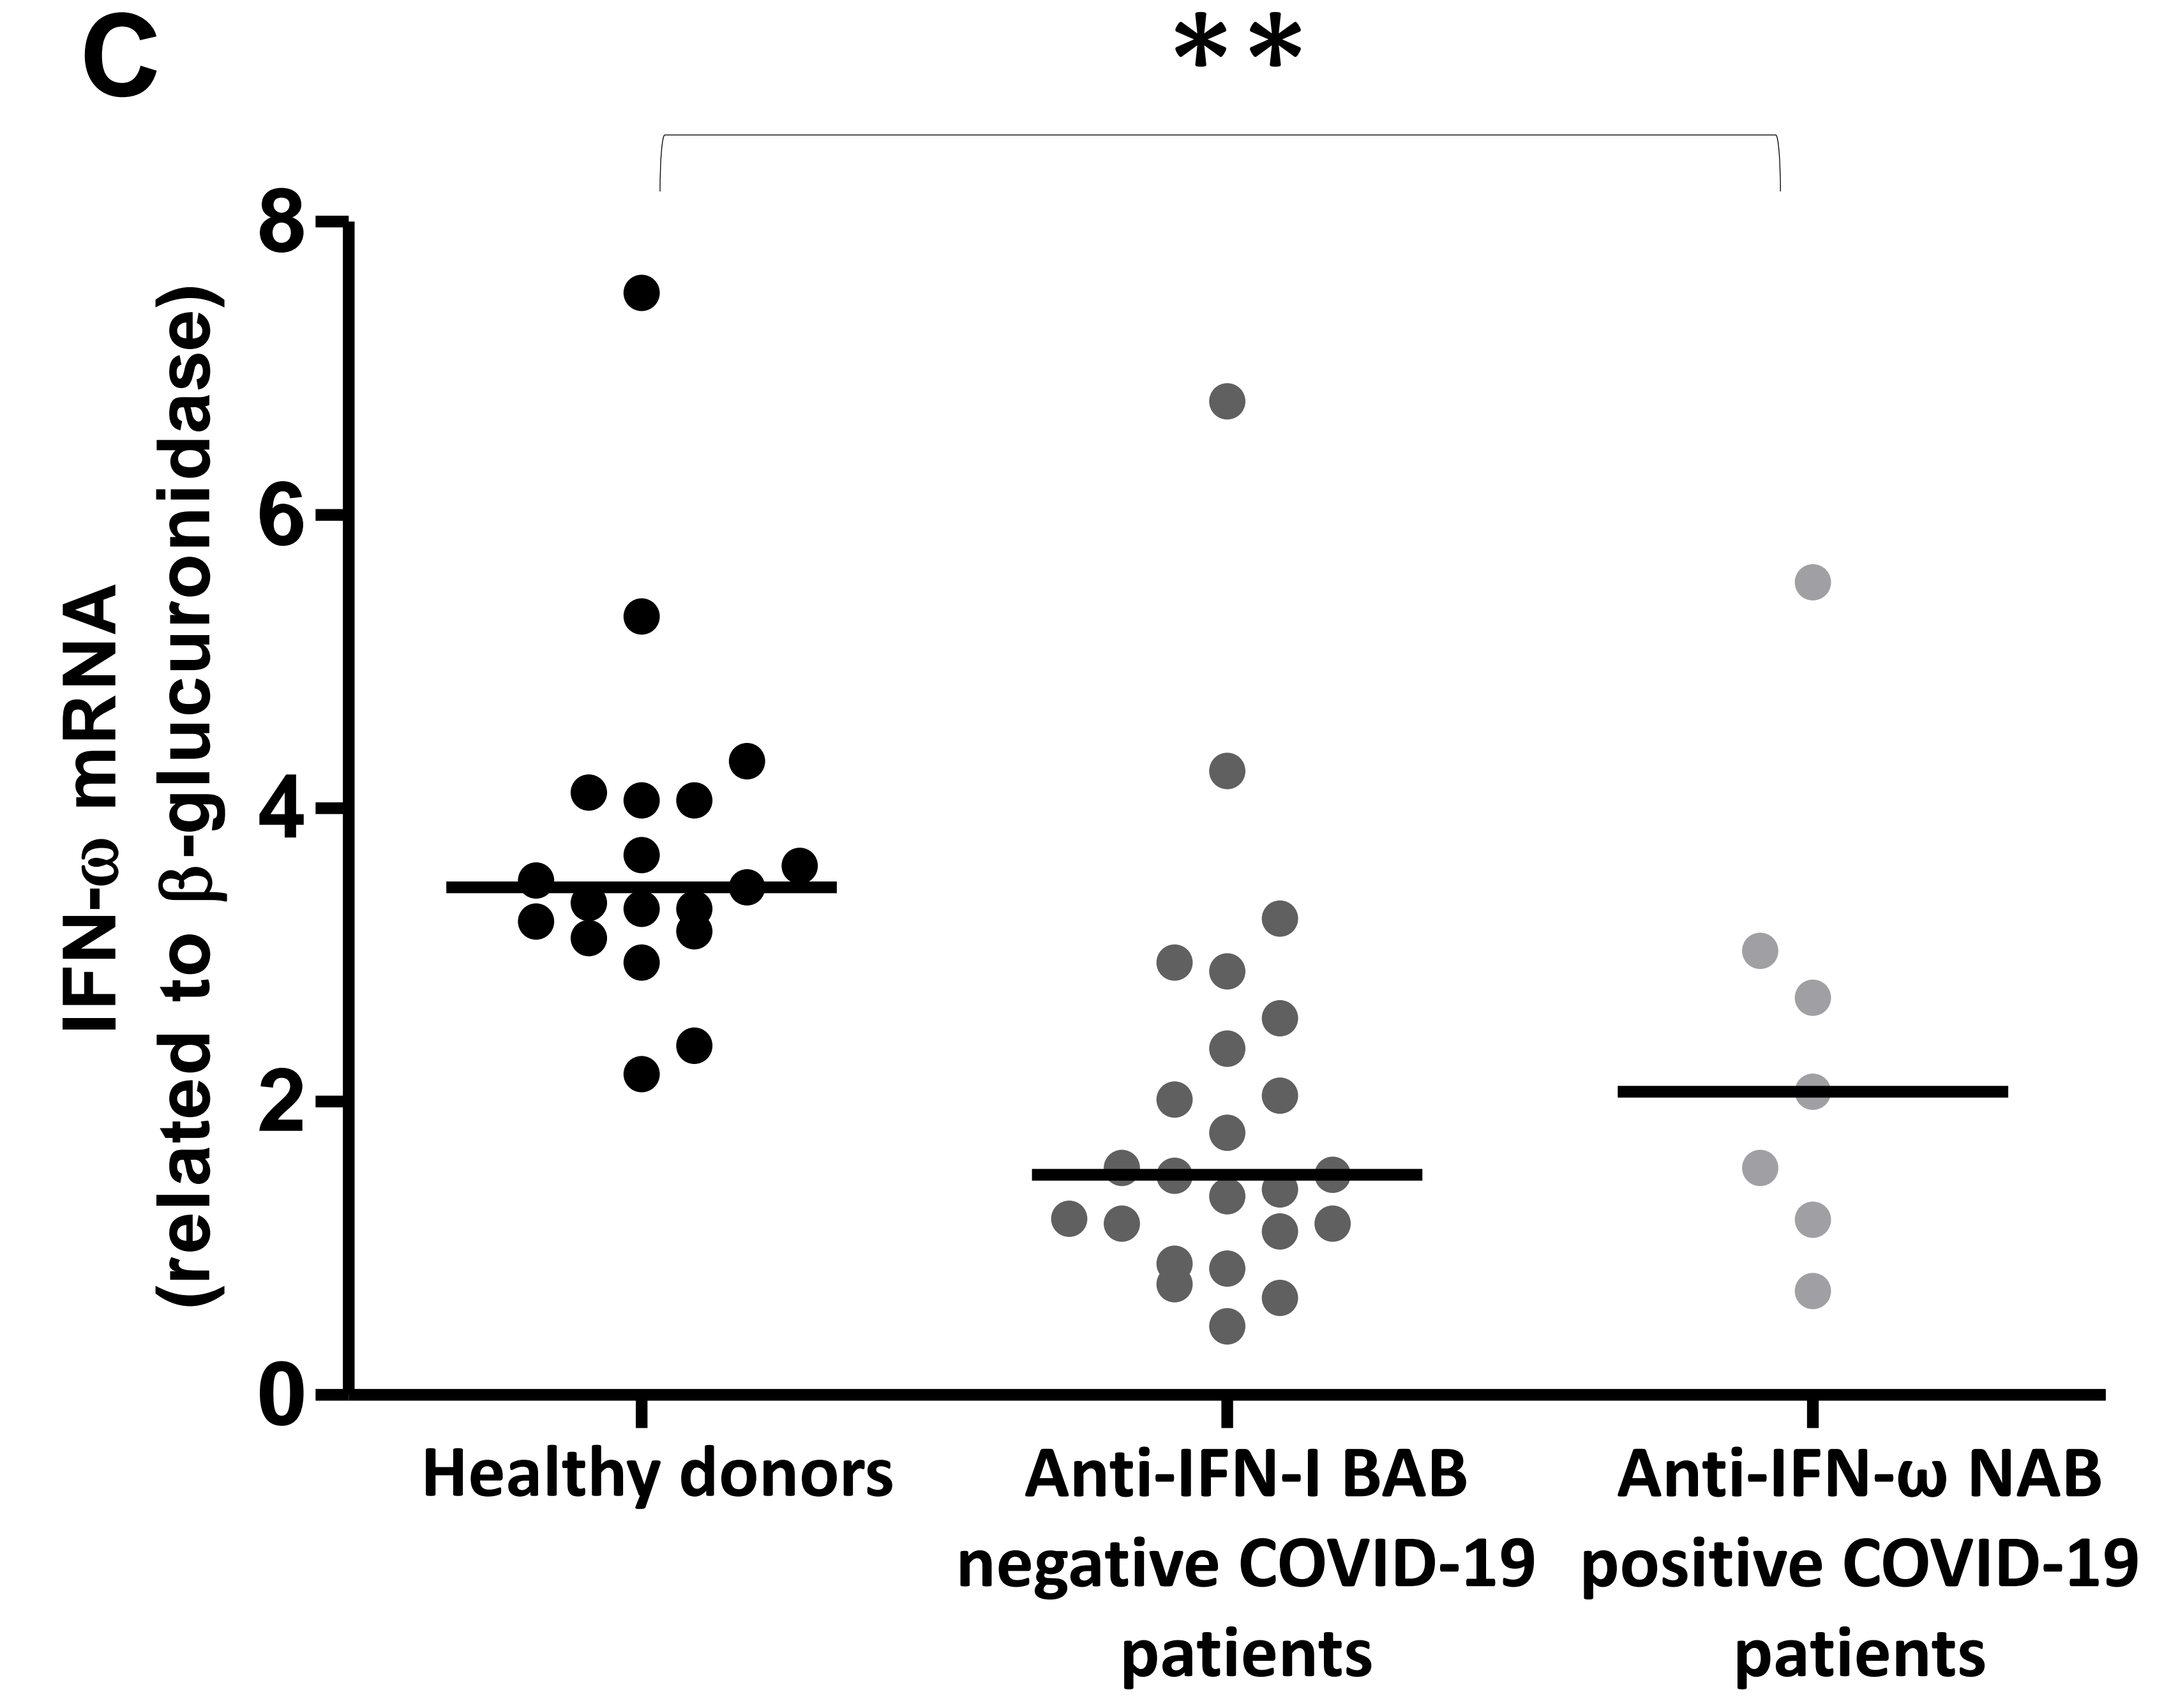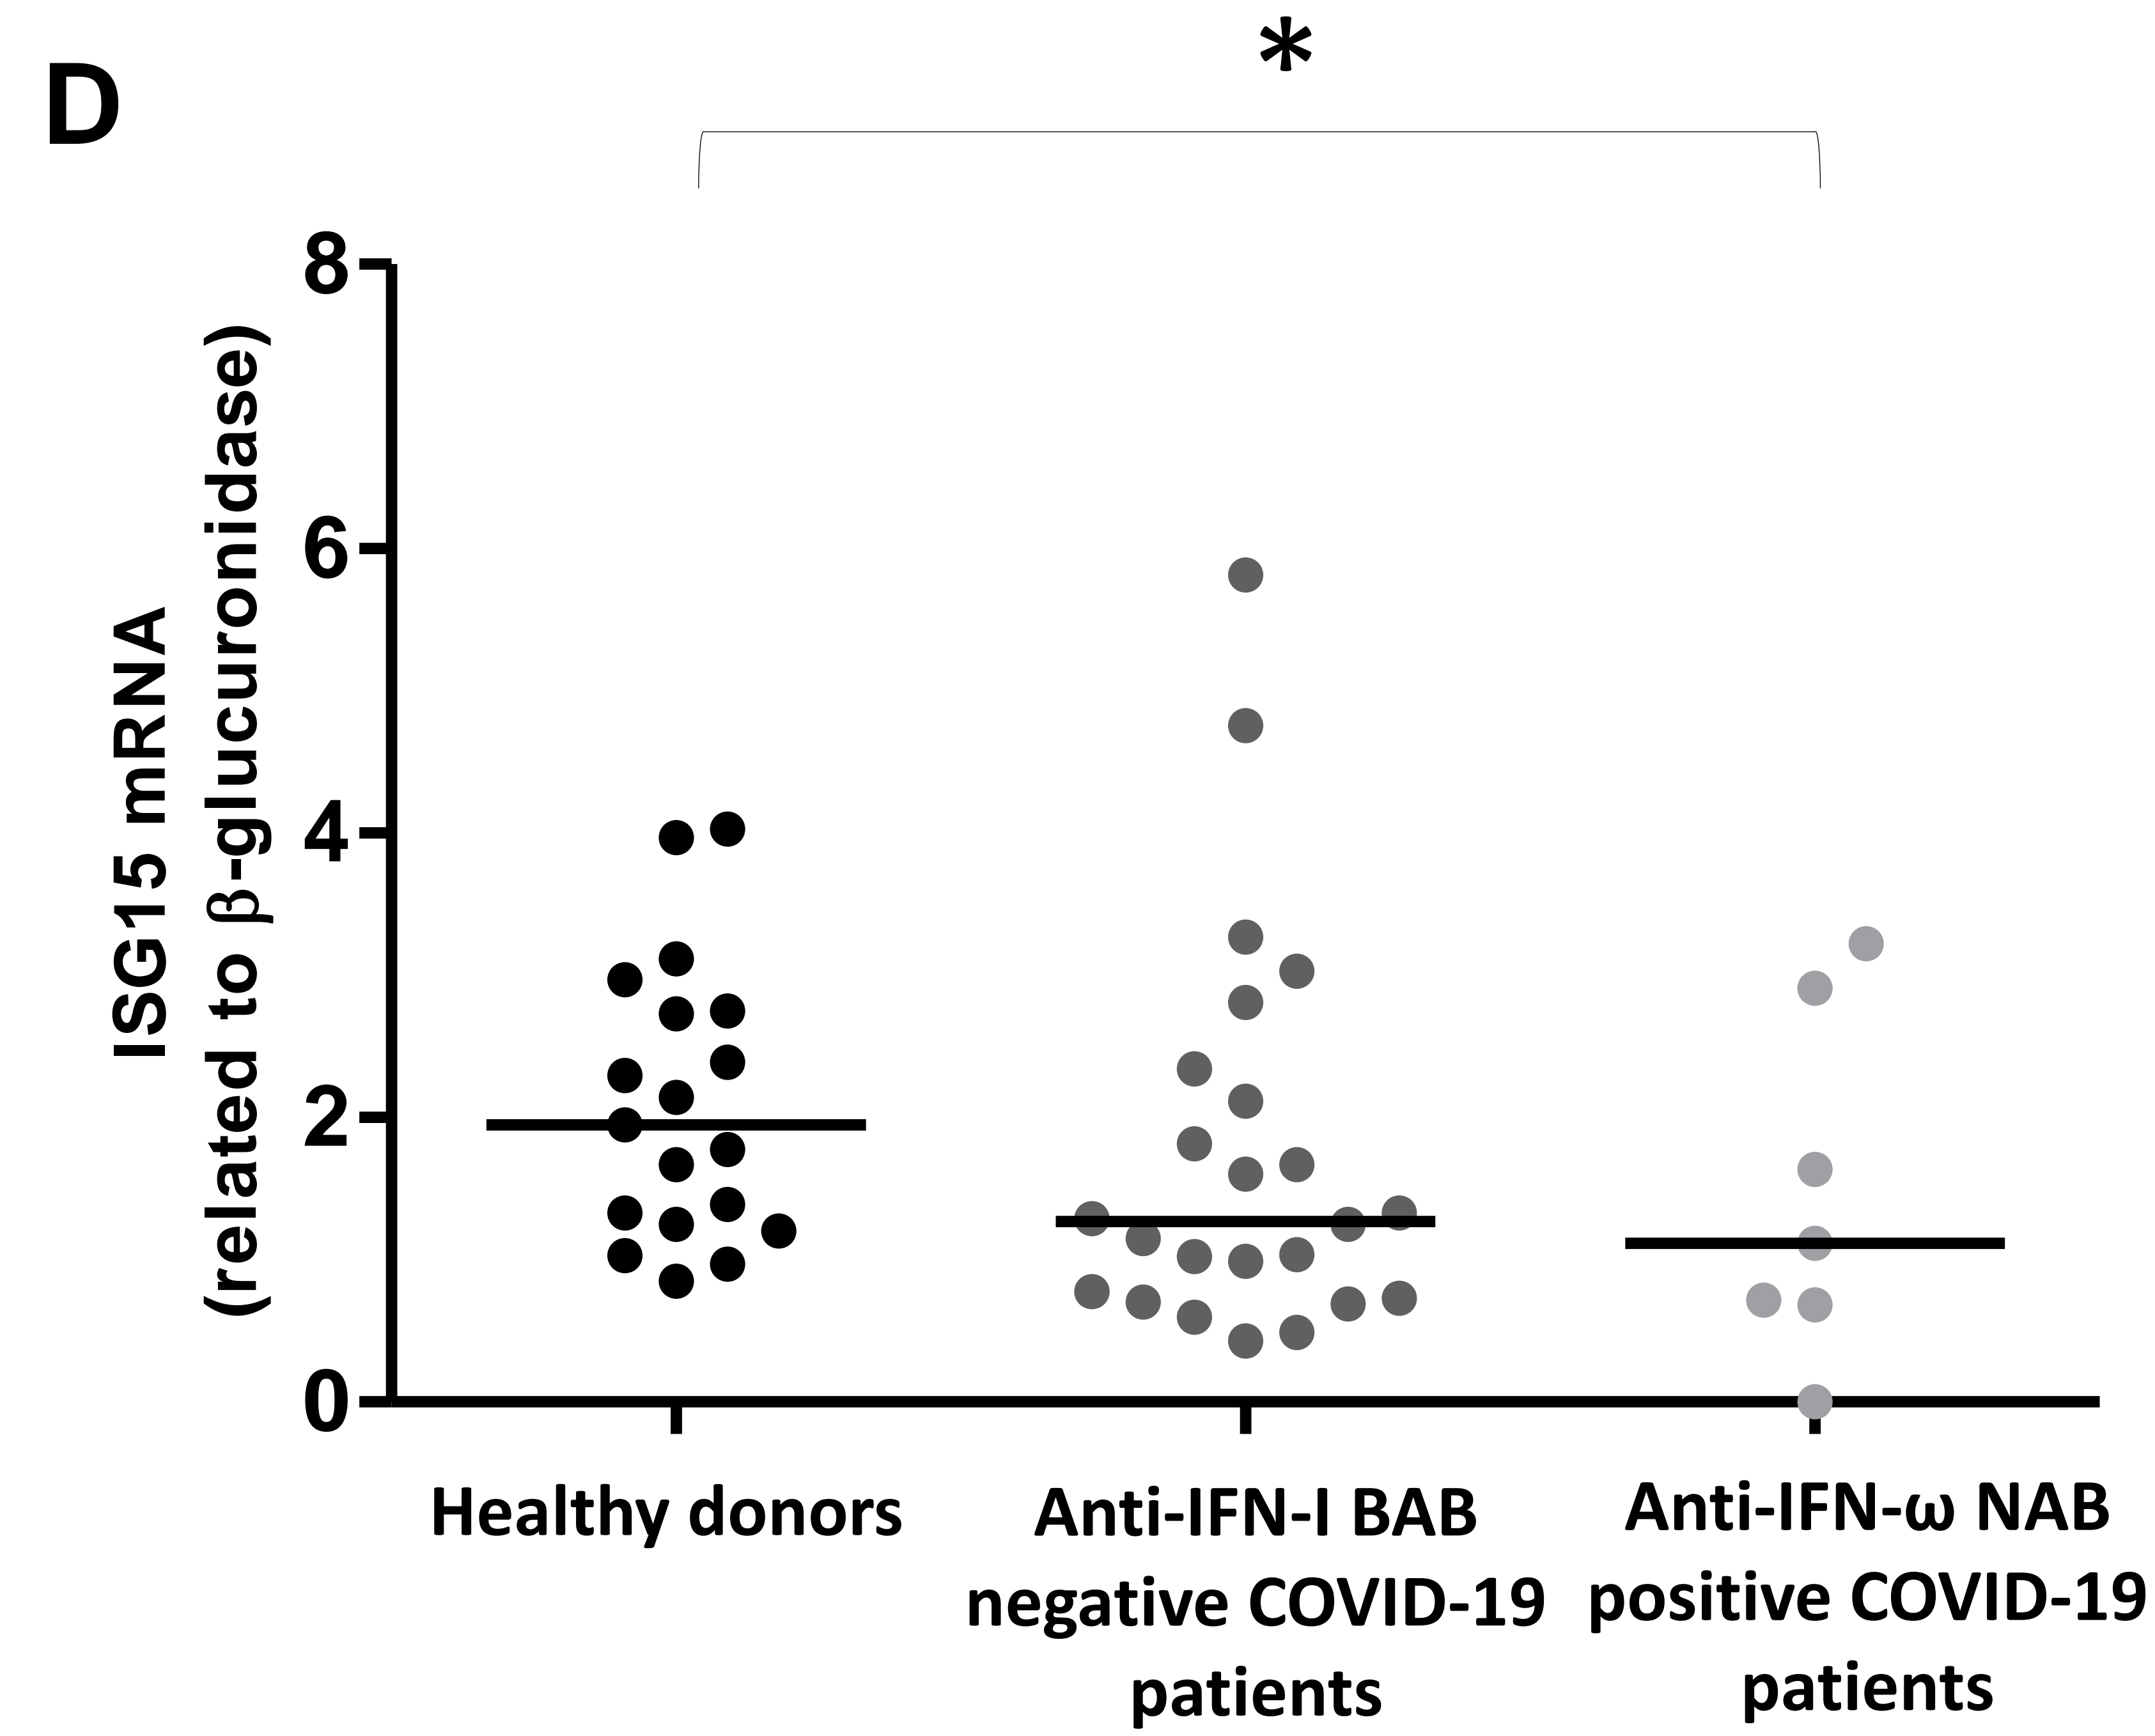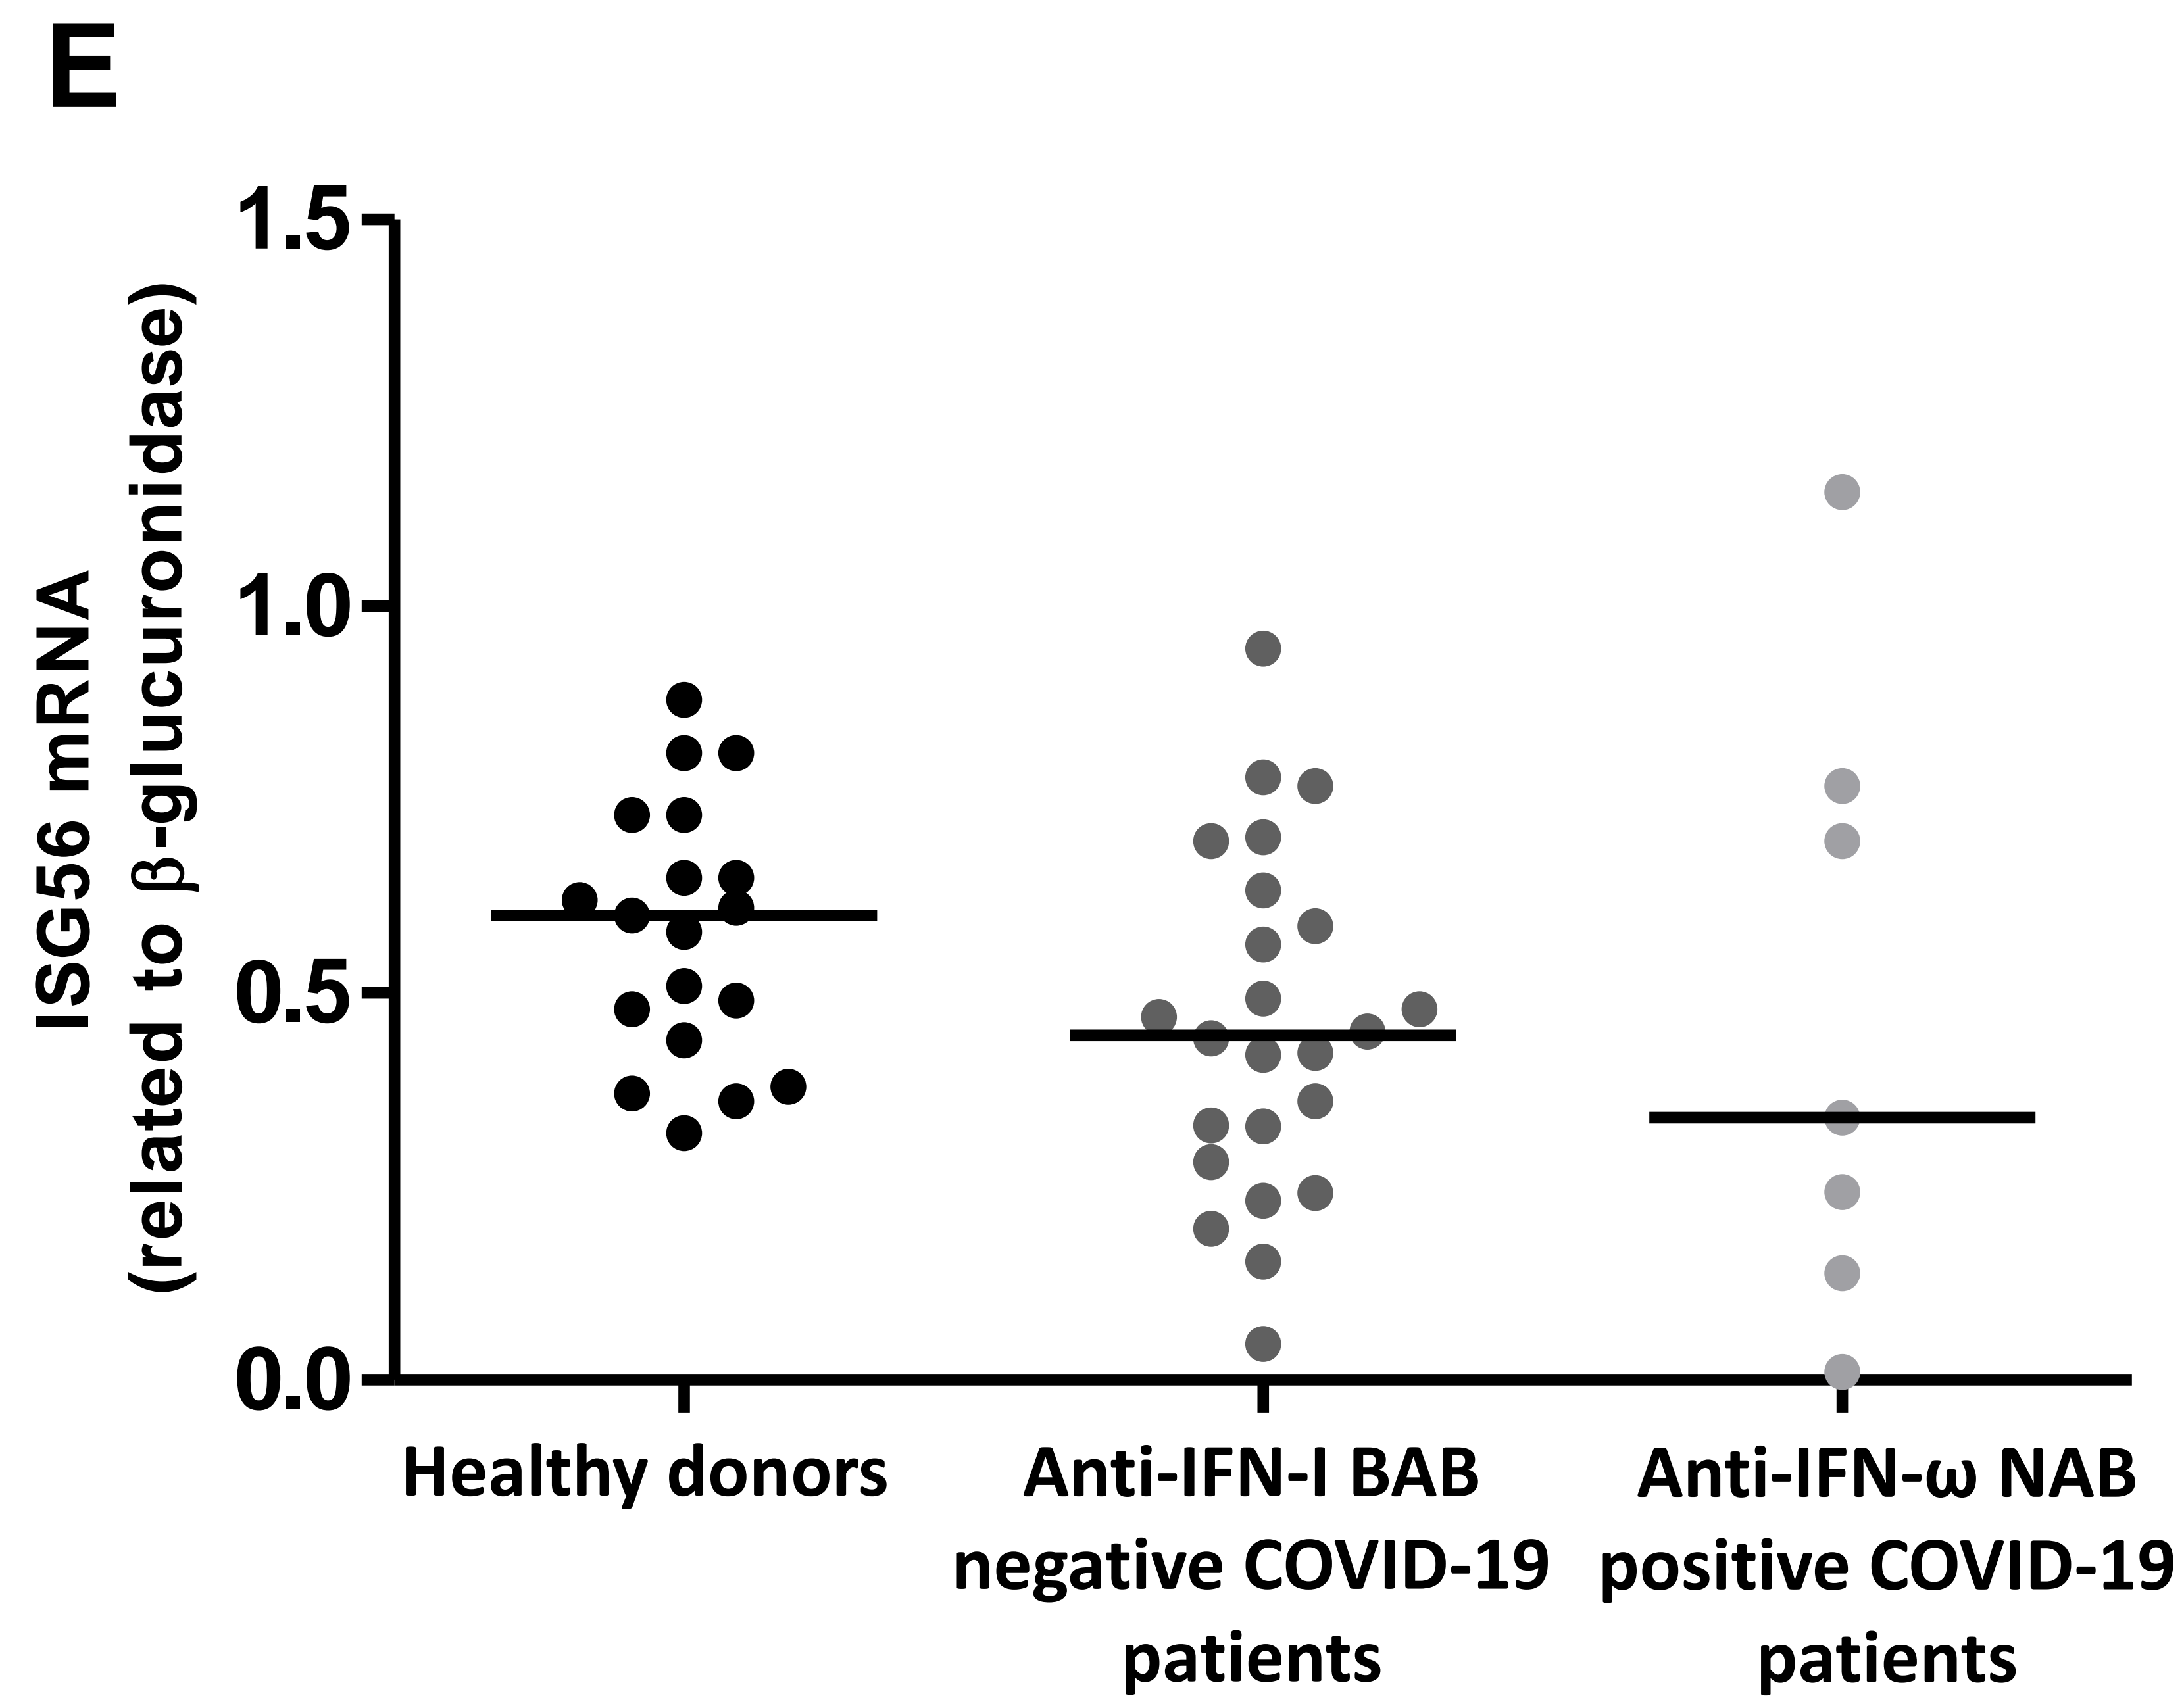

**Supplementary Figure 2. Expression levels of IFN-I and IFN stimulated genes (ISGs) in anti-IFN- $\omega$  NAB positive COVID-19 patients.** Panels A-E represent expression levels of genes encoding IFN- $\alpha$  (Panel A), IFN- $\beta$  (Panel B), IFN- $\omega$  (Panel C), ISG15 (Panel D) and ISG56 (Panel E) in PBMC collected from healthy donors (n=19), anti-IFN-I BAB negative COVID-19 patients (n=24), and those who developed anti-IFN- $\omega$  NAB (n=7). Gene expression data were available for 7 out of 9 patients with NAB to IFN- $\omega$ . Statistical analysis of transcript levels of IFNs and ISGs genes related to  $\beta$ -glucuronidase ( $2^{-\Delta C_t}$ ) method was carried out using Mann-Whitney test. Median values of gene expression levels are reported, for each group of study, with a black horizontal line. \*p <0.01; \*\*p <0.001.

# Supplementary Figure 3

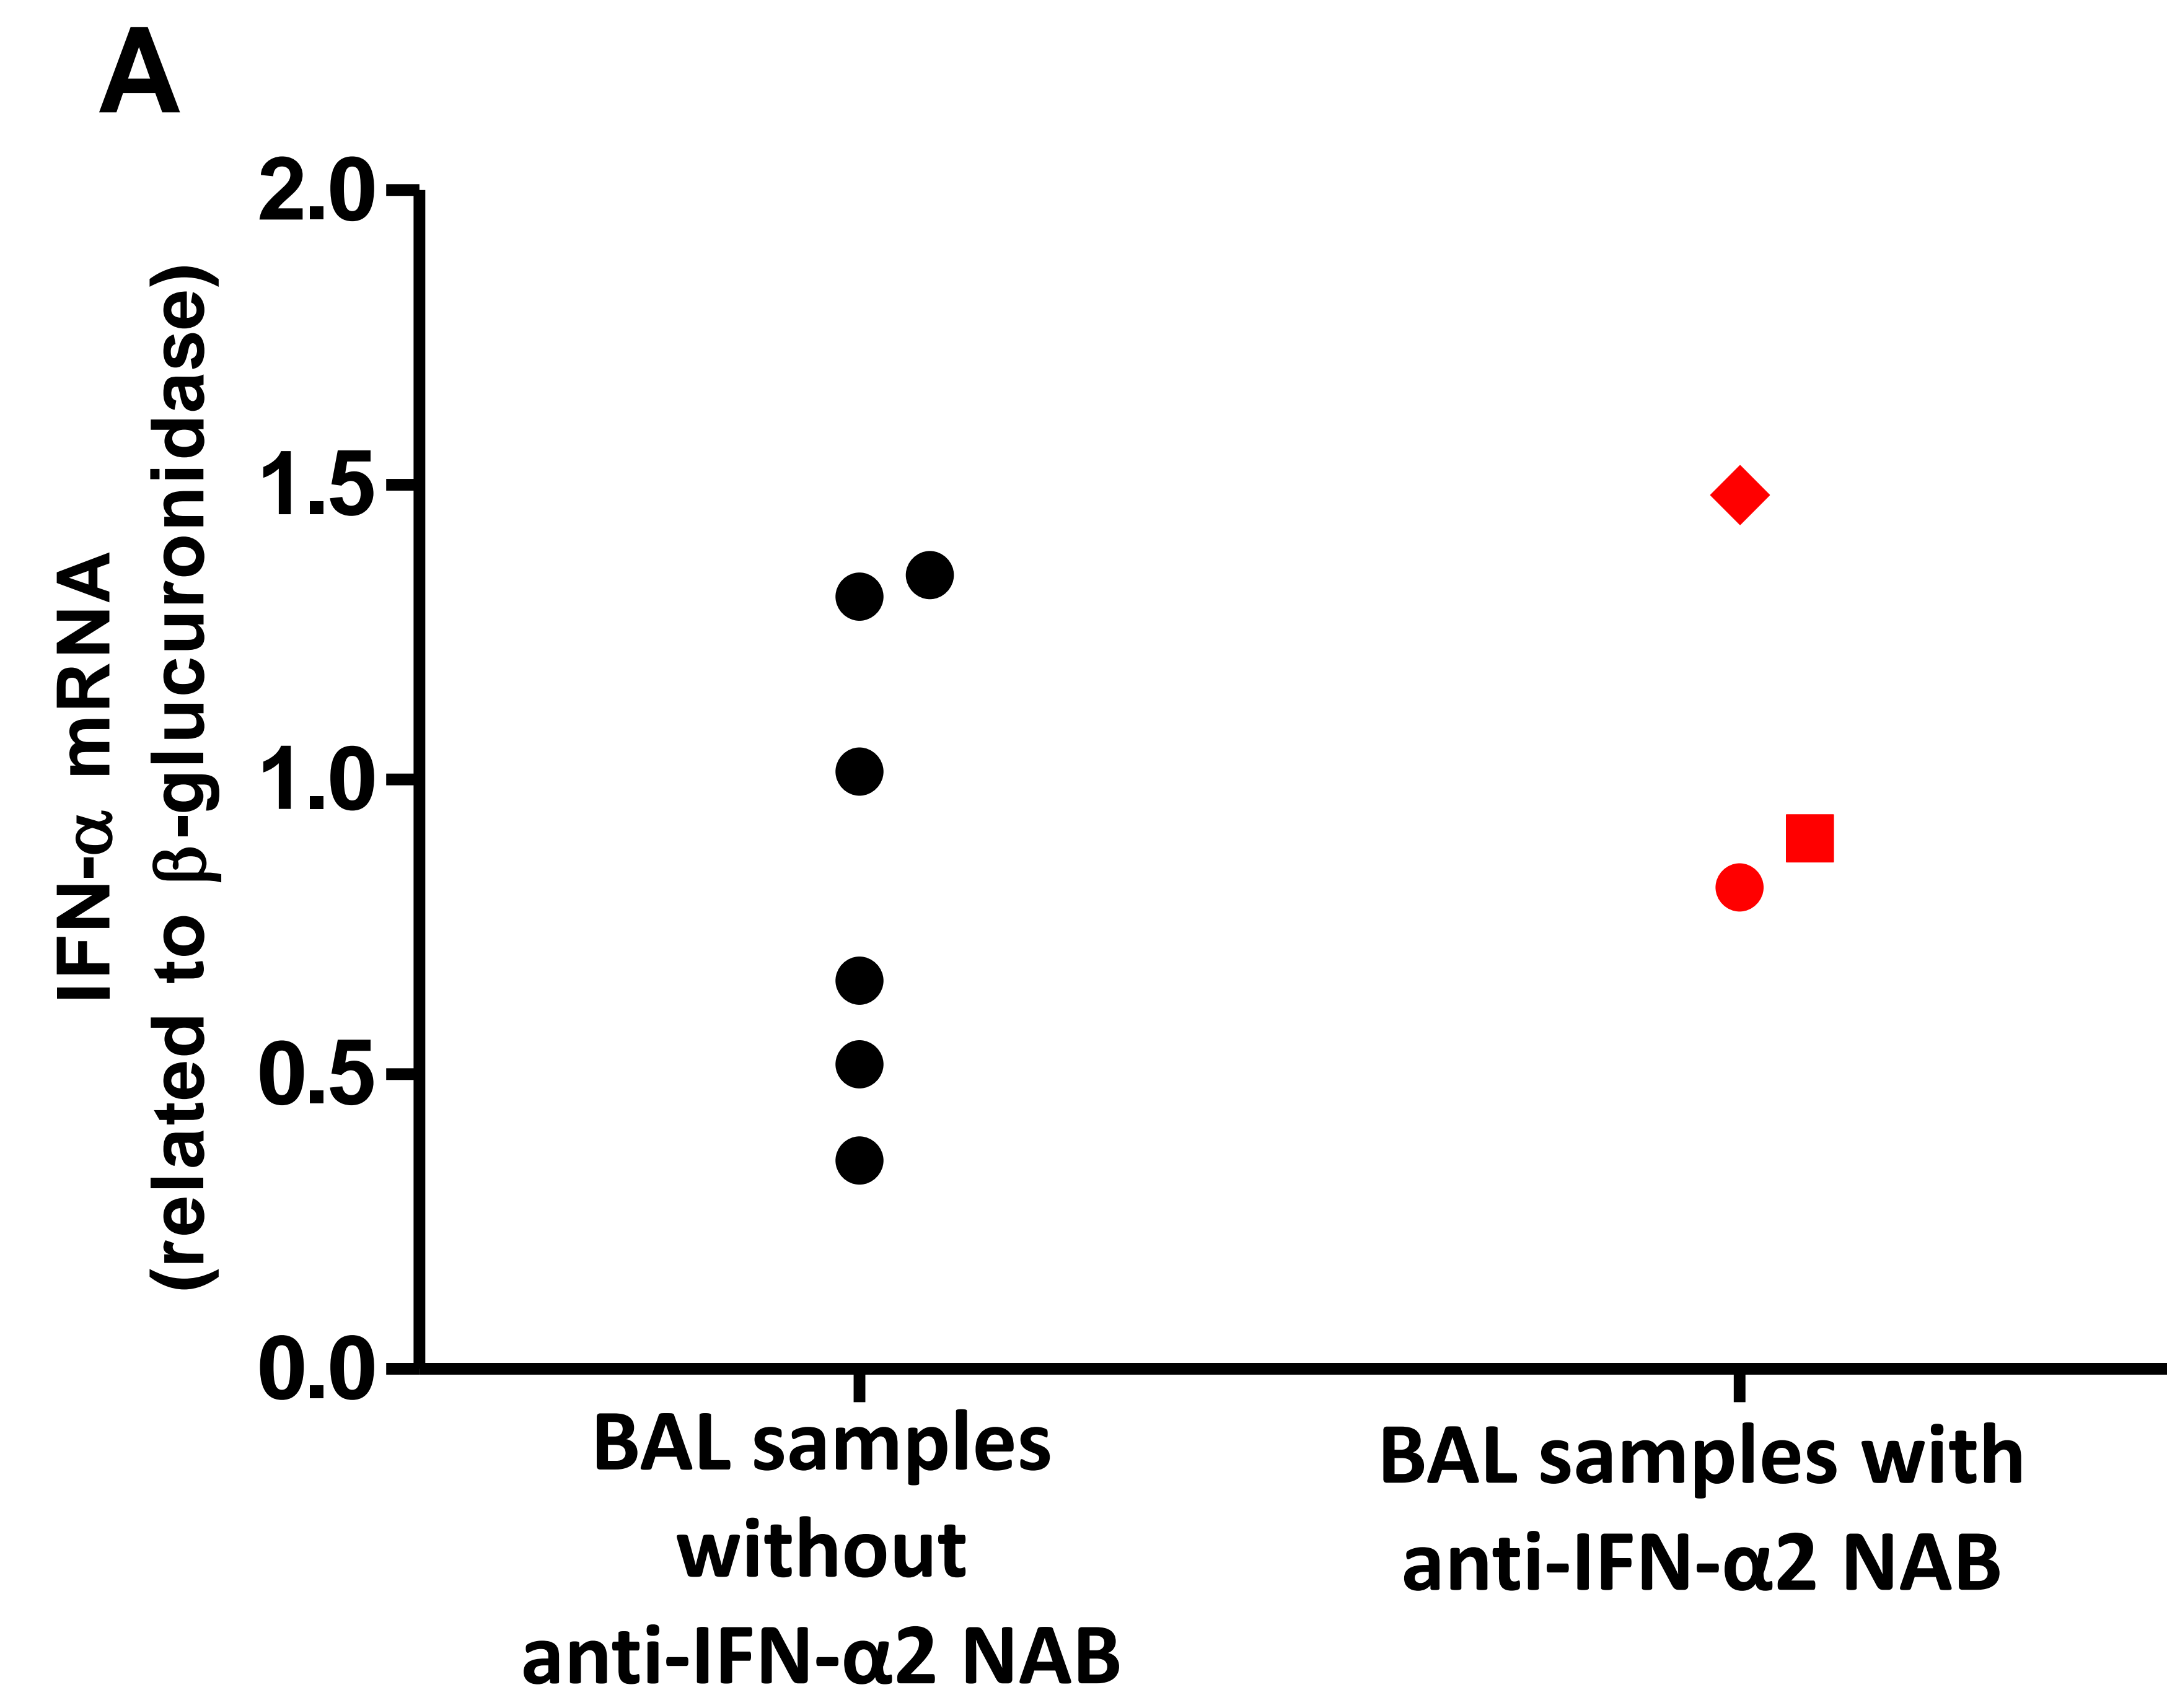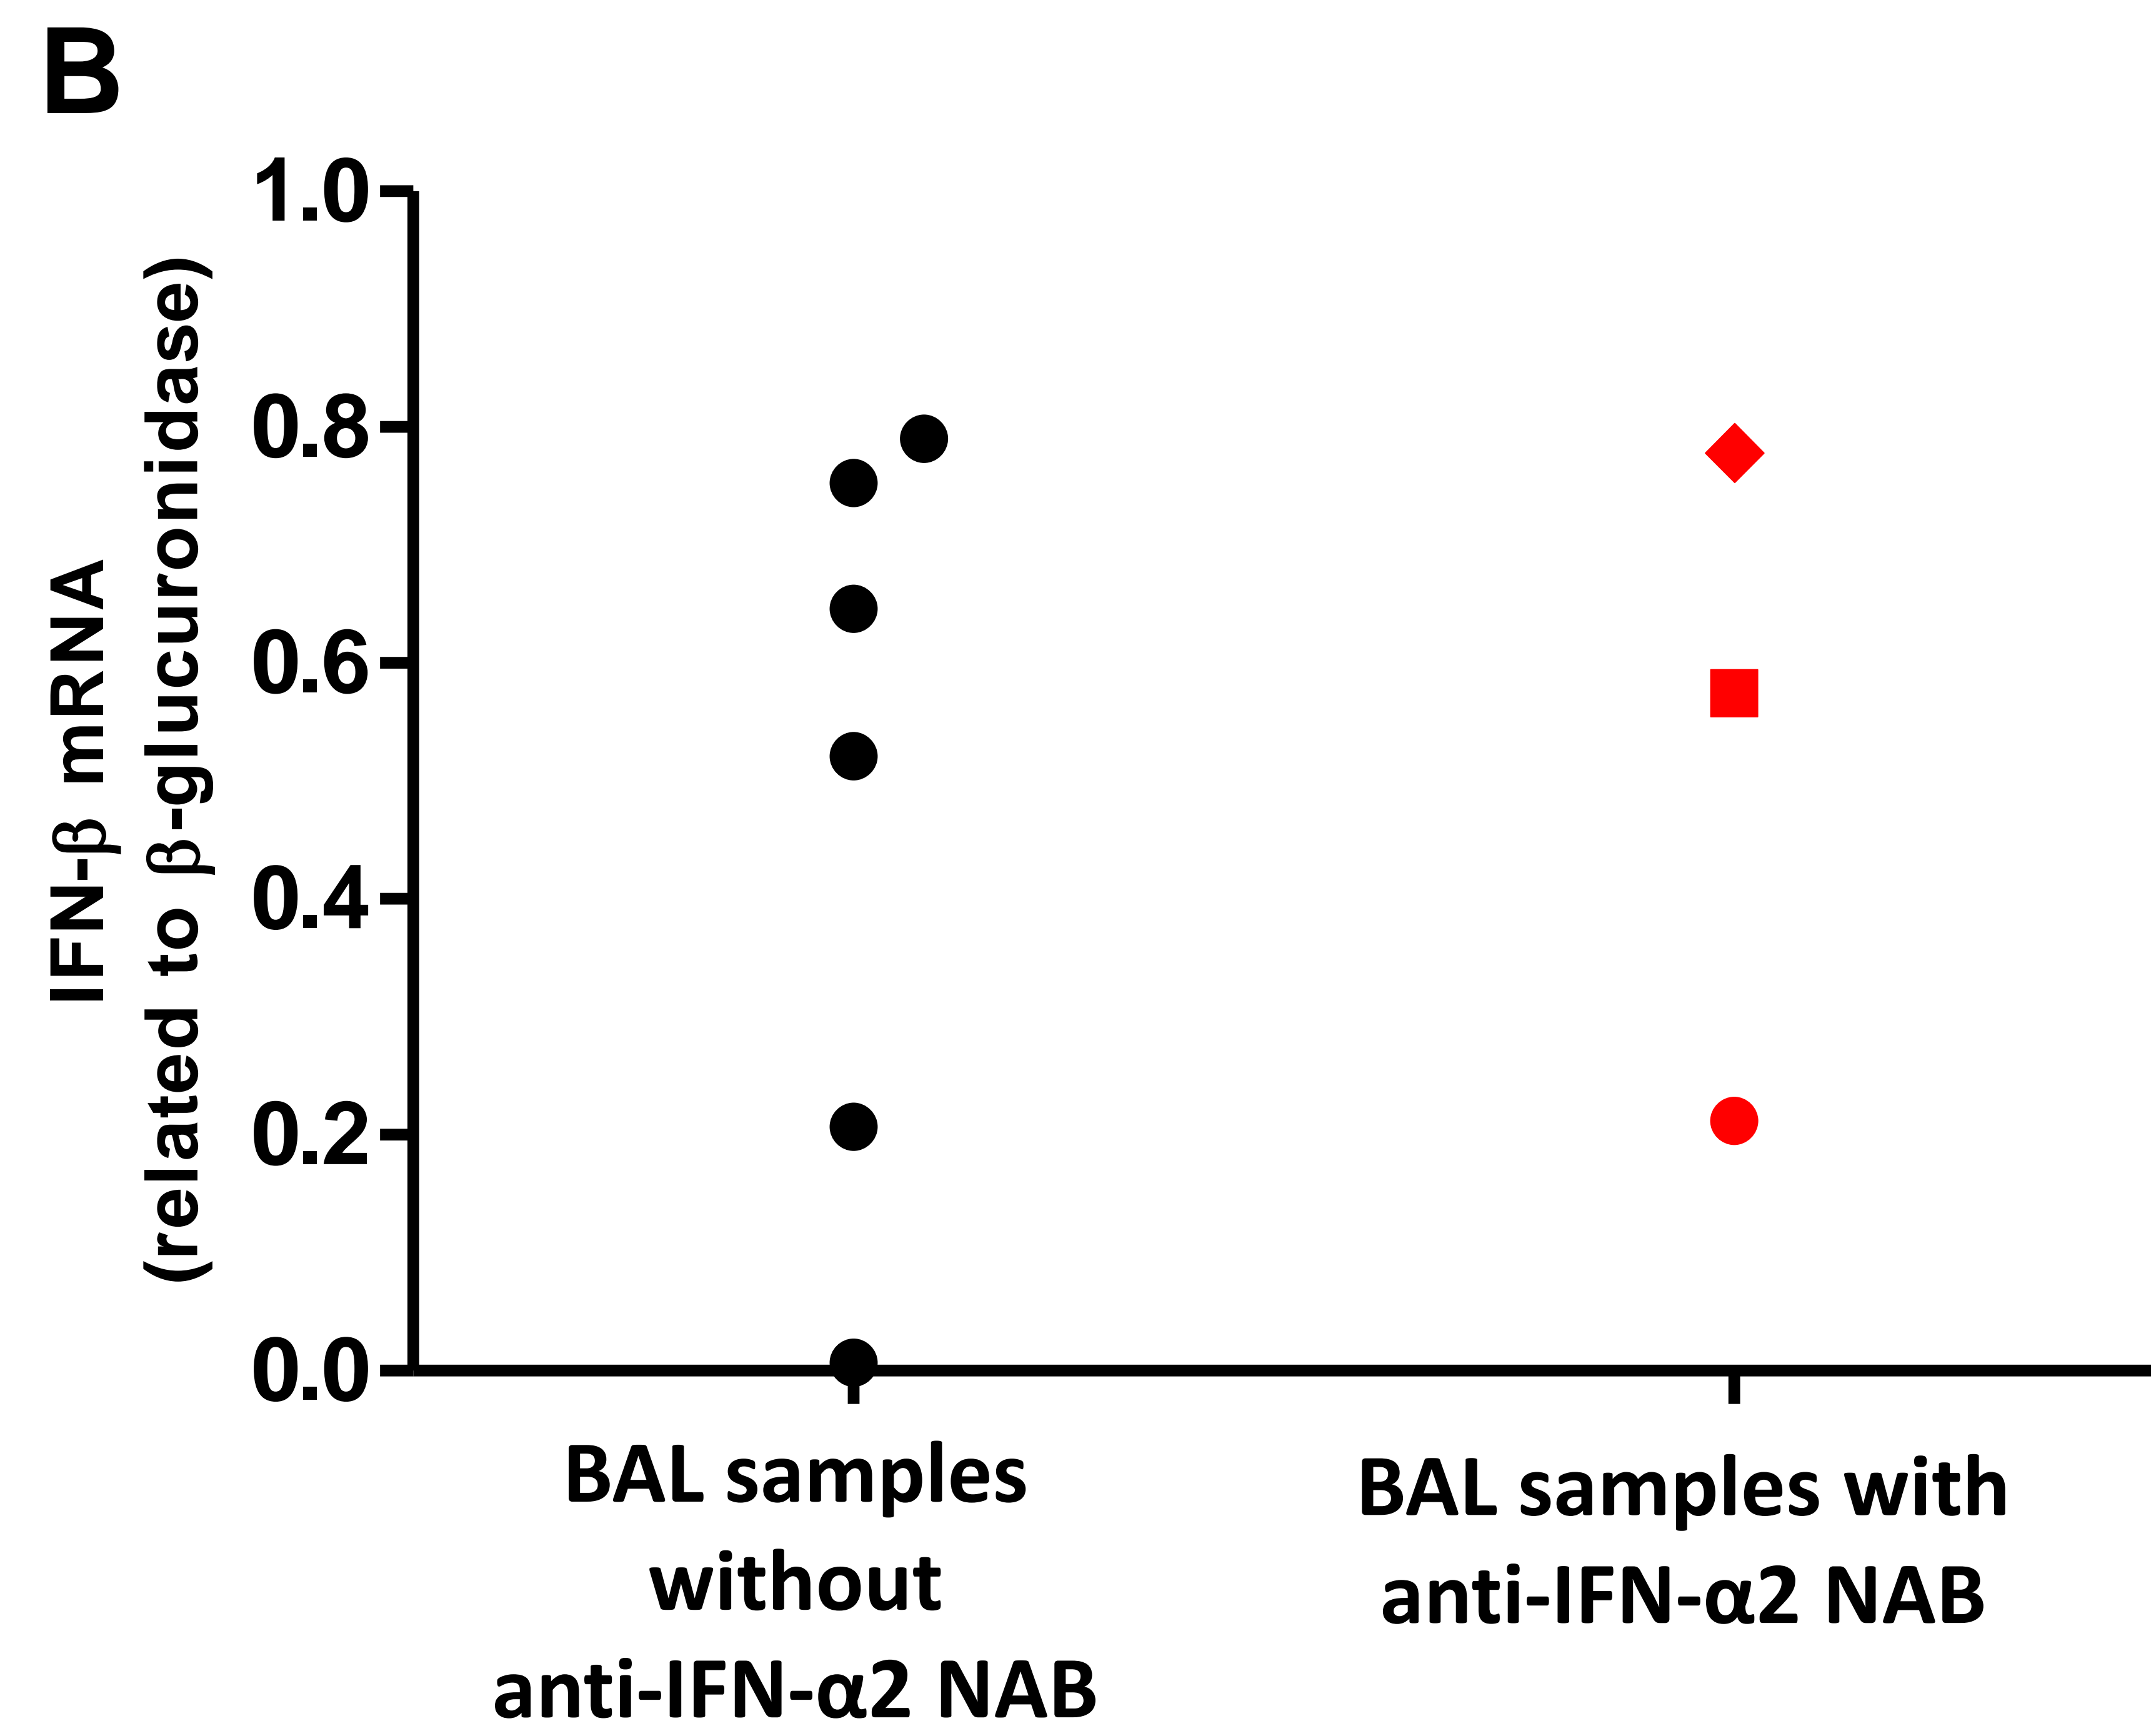

- Pt.7 – anti-IFN- $\alpha$ 2 NAB (20 TRU/ml)
- Pt.22 – anti-IFN- $\alpha$ 2 NAB (15 TRU/ml)
- ◆ Pt.23 – anti-IFN- $\alpha$ 2 NAB (10 TRU/ml)

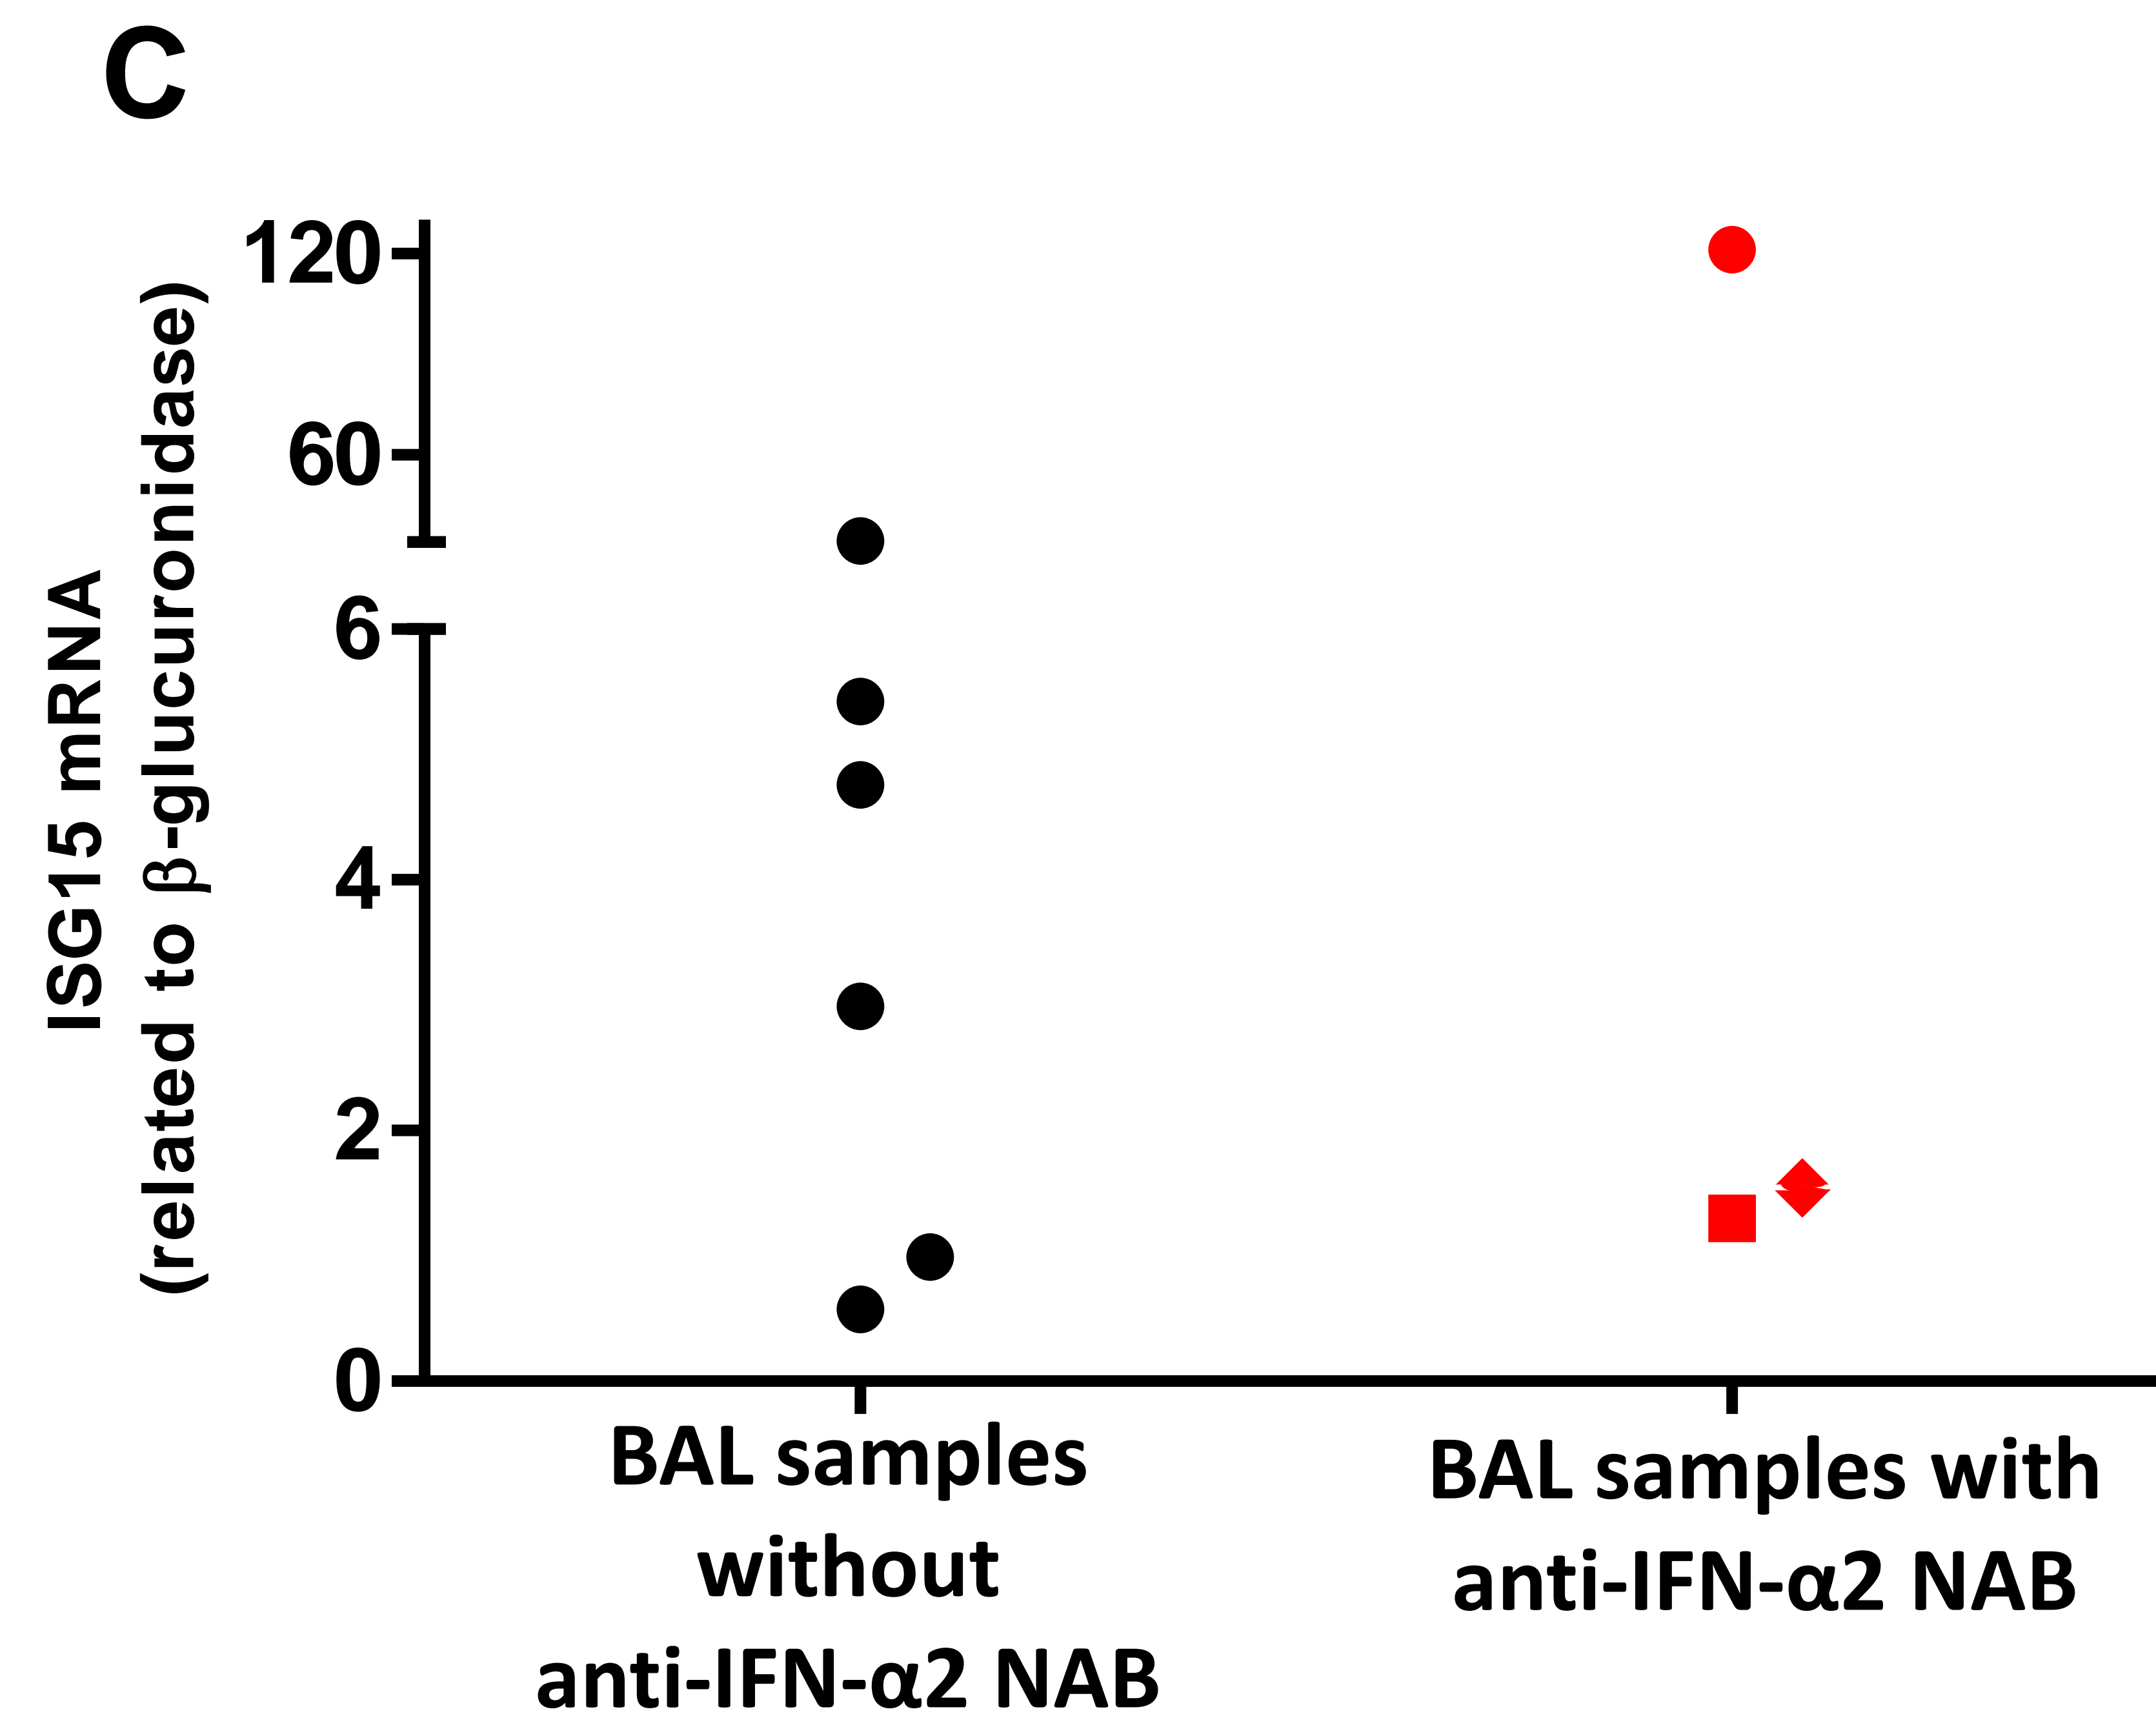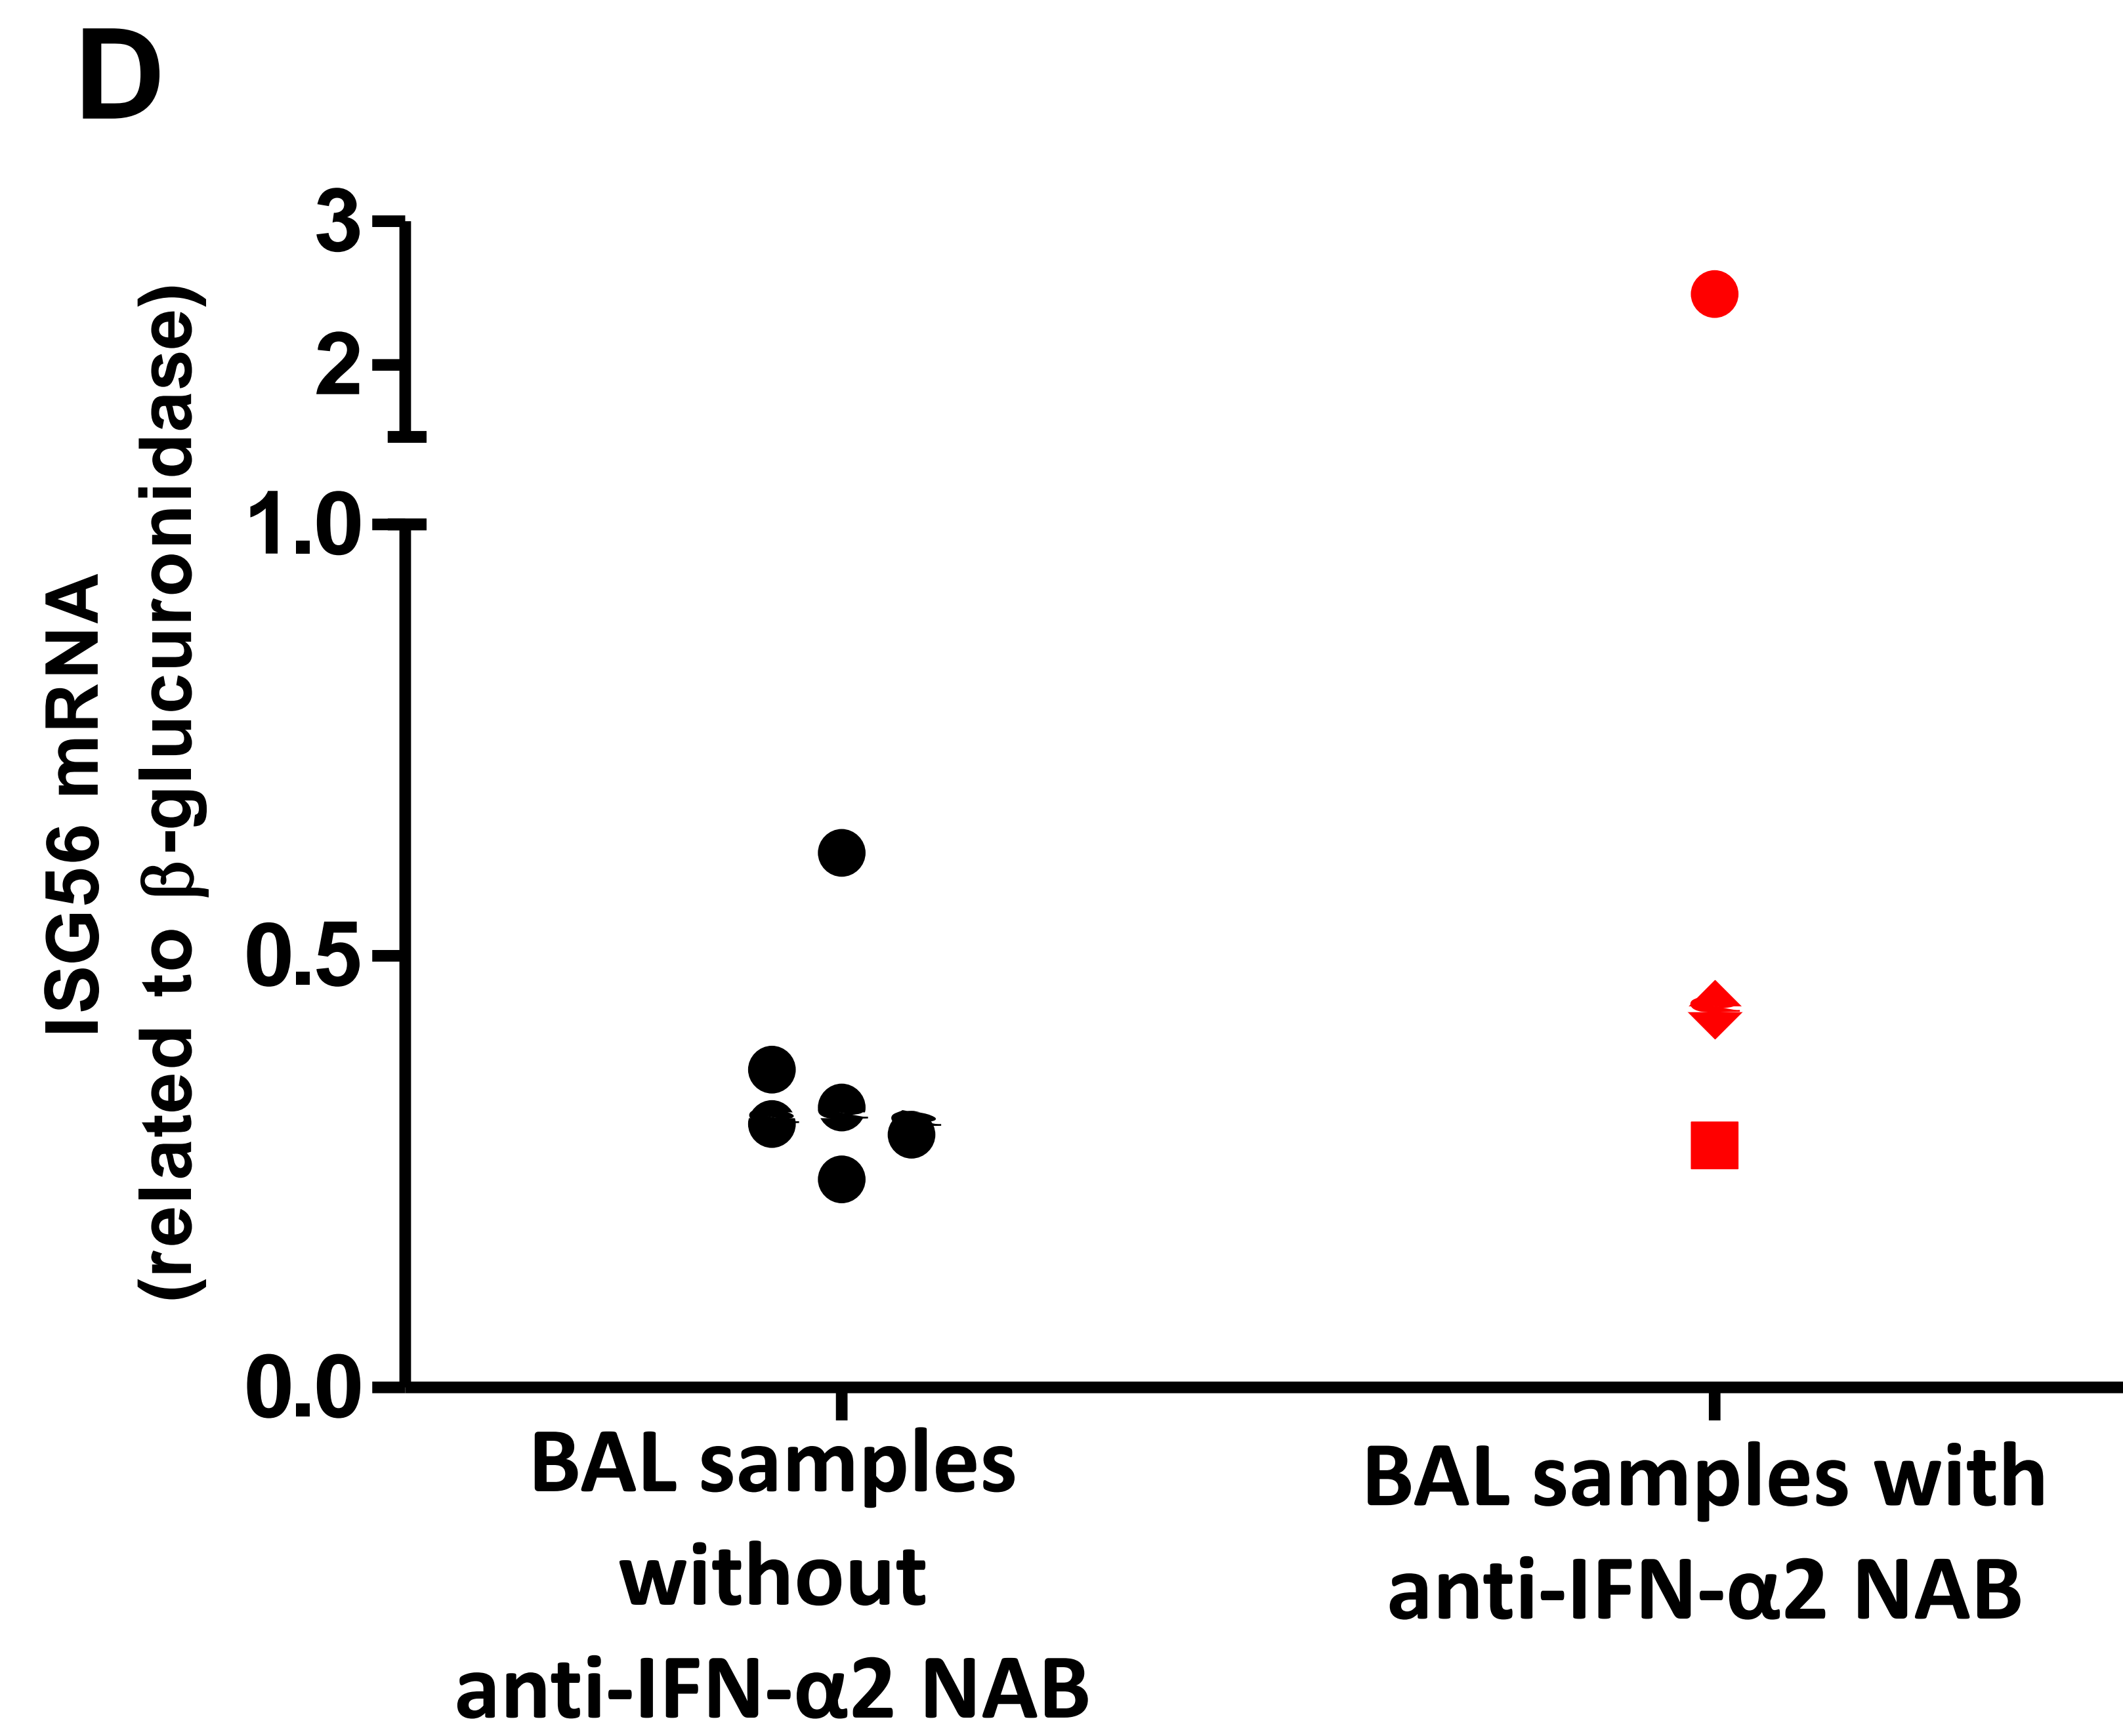



**Supplementary Figure 3. Expression levels of IFN- $\alpha/\beta$  and IFN stimulated genes in respiratory samples of anti-IFN- $\alpha$  NAB positive COVID-19 patients.** Expression levels of genes encoding IFN- $\alpha$  (Panel A), IFN- $\beta$  (Panel B), ISG15 (Panel C) and ISG56 (Panel D) in bronchoalveolar lavage (BAL) collected from COVID-19 patients with (n=3, Pt 7, Pt 22 and Pt 23) or without anti-IFN- $\alpha$ 2 NAB (n=6). For each patient (Pt 7, Pt 22 and Pt 23) is indicated the NAB titer against IFN- $\alpha$ 2 subtype. Distinct red symbols (square, circle and rhombus) represent COVID-19 patients (n=3) with anti-IFN- $\alpha$ 2 NAB in BAL samples. IFN- $\beta$  data were available for 5 out of 6 BAL samples without anti-IFN- $\alpha$ 2 NAB.
